# Supplementary material for: Lewis acid triggered N-alkylation of sulfoximines through nucleophilic ring-opening of donor–acceptor cyclopropanes: synthesis of γ-sulfoximino malonic diesters
Source: Royal Society of Chemistry journal article supplement (doi:10.1039/d2ob00213b), 2022-01-01
Supplement: d2ob00213b1.pdf [file d2ob00213b1.pdf]

## **Electronic Supplementary Information**

### **Lewis acid triggered *N*-alkylation of sulfoximines through nucleophilic ring-opening of donor-acceptor cyclopropanes: synthesis of $\gamma$ -sulfoximino malonic diesters**

Satish G. More, <sup>a, b</sup> Gurunath Suryavanshi <sup>\*, a, b</sup>

<sup>†</sup> *Chemical Engineering & Process Development Division, CSIR-National Chemical Laboratory, Dr. Homi Bhabha Road, Pune, Maharashtra, India- 411008.*

<sup>‡</sup> *Academy of Scientific and Innovative Research (AcSIR), Ghaziabad, Uttar Pradesh, INDIA- 201 002*

<sup>\*</sup> *Corresponding Author: Tel.: +91 20 25902547; Fax: +91 20 25902676;*

*E-mail: [gm.suryavanshi@ncl.res.in](mailto:gm.suryavanshi@ncl.res.in)*

## Table of Contents

| Sr. No. | Description                                                                                                         | Page No. |
|---------|---------------------------------------------------------------------------------------------------------------------|----------|
| 1.      | X-Ray crystallography of compound (3q)                                                                              | S3-S5    |
| 2.      | HPLC Data                                                                                                           | S6-S7    |
| 3.      | Copies of <sup>1</sup> H, <sup>13</sup> C and <sup>19</sup> F NMR spectra of products                               | S8-S36   |
| 4.      | Copy of <sup>1</sup> H, <sup>13</sup> C NMR spectrum of $\gamma$ -sulfoximino, $\alpha$ - bromo malonic diester (6) | S37      |
| 5.      | Copy of <sup>1</sup> H, <sup>13</sup> C NMR spectrum of synthetic utility of product 3a (7)                         | S38      |

## 1. X-Ray crystallography data of compound (3q)

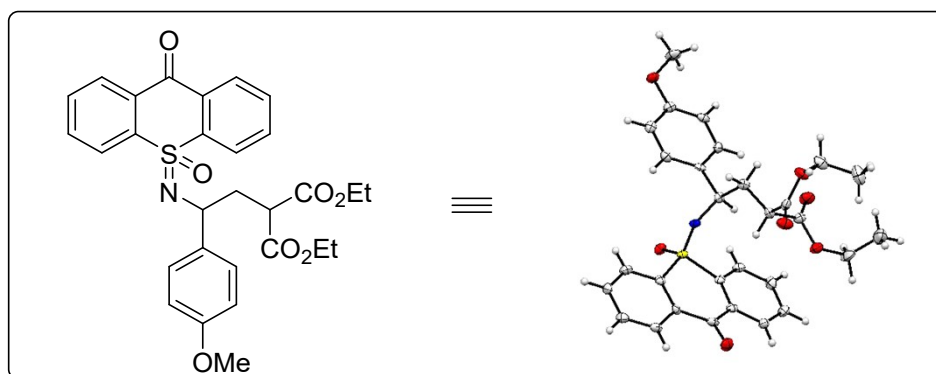

(CCDC Deposition No.- 2114333)

Single-crystal diffraction analysis data were collected at 100 K with a BRUKER KAPPA APEX II CCD Duo diffractometer (operated at 1500 W power: 50 kV, 30 mA) using graphite monochromatic Mo K $\alpha$  radiation ( $\lambda = 0.71073 \text{ \AA}$ ). In case of disordered solvent molecules, the contributions to the scattering arising from the disordered solvents in the crystal were removed by use of the utility SQUEEZE in the PLATON software package.

### Sample preparation method for crystal growth

The 10 mg compound (3q) was taken in a 2 ml glass vial, 1ml Methanol solvent was added, and the vial was closed with the cotton plug. Kept it for 4 to 5 days for growing of crystal. Slow evaporation at room temperature in a dark place till crystals formed.

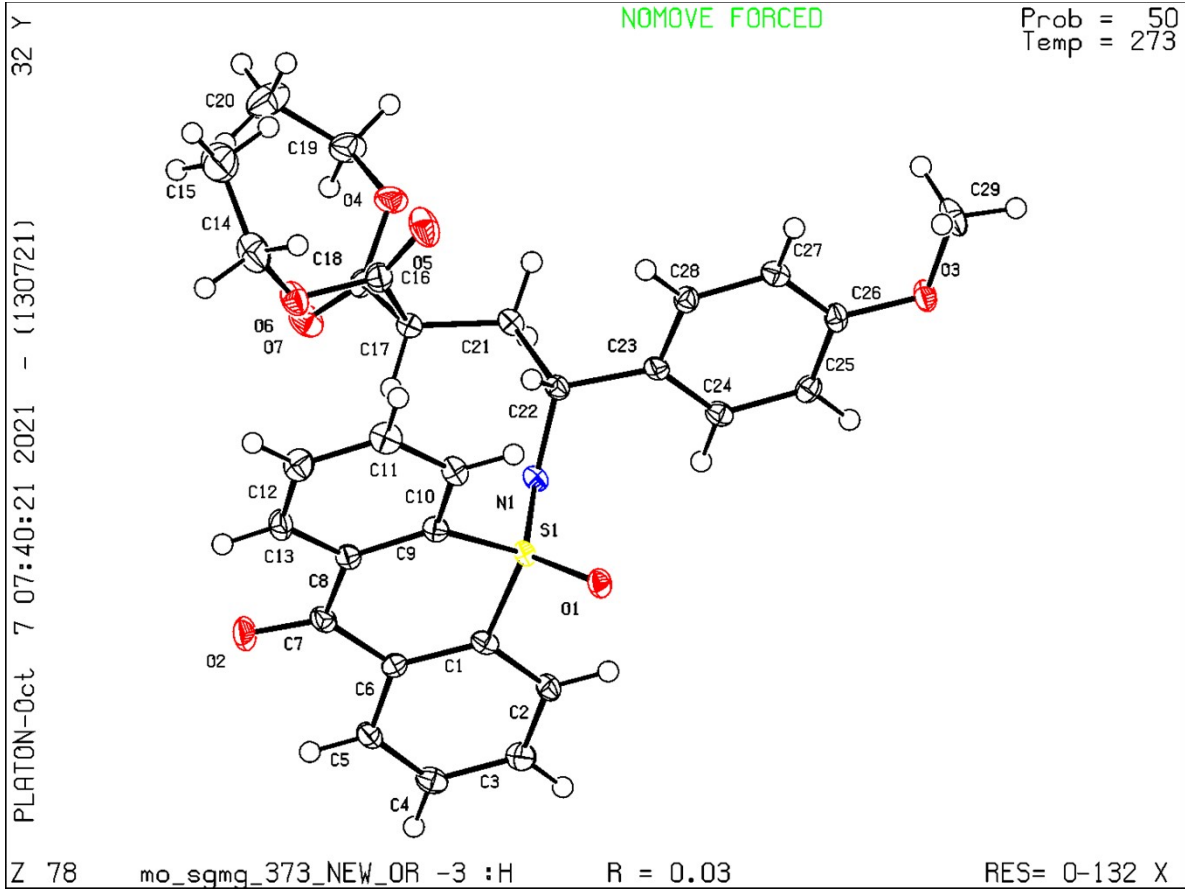

The thermal ellipsoid was drawn at the 50% probability level

## checkCIF/PLATON report

Structure factors have been supplied for datablock(s) mo\_sgmg\_373\_NEW\_0m\_a

THIS REPORT IS FOR GUIDANCE ONLY. IF USED AS PART OF A REVIEW PROCEDURE FOR PUBLICATION, IT SHOULD NOT REPLACE THE EXPERTISE OF AN EXPERIENCED CRYSTALLOGRAPHIC REFEREE.

No syntax errors found. CIF dictionary Interpreting this report

### Datablock: mo\_sgmg\_373\_NEW\_0m\_a

---

Bond precision: C-C = 0.0032 Å Wavelength=0.71073  
Cell: a=41.083(6) b=41.083(6) c=8.1322(10)  
alpha=90 beta=90 gamma=120  
Temperature: 273 K

|                        | Calculated     | Reported       |
|------------------------|----------------|----------------|
| Volume                 | 11887(4)       | 11887(4)       |
| Space group            | R -3           | R -3 :H        |
| Hall group             | -R 3           | -R 3           |
| Moiety formula         | C29 H29 N O7 S | ?              |
| Sum formula            | C29 H29 N O7 S | C29 H29 N O7 S |
| Mr                     | 535.59         | 535.59         |
| Dx, g cm <sup>-3</sup> | 1.347          | 1.347          |
| Z                      | 18             | 18             |
| Mu (mm <sup>-1</sup> ) | 0.171          | 0.171          |
| F000                   | 5076.0         | 5076.0         |
| F000'                  | 5080.79        |                |
| h, k, lmax             | 45, 45, 9      | 45, 45, 9      |
| Nref                   | 3839           | 3835           |
| Tmin, Tmax             | 0.950, 0.966   |                |
| Tmin'                  | 0.950          |                |

Correction method= Not given

Data completeness= 0.999 Theta(max)= 23.363

R(reflections)= 0.0323( 3390) wR2(reflections)=  
0.0742( 3835)

S = 0.603 Npar= 347

## 2. HPLC Data

### 1) HPLC of (±) 1a

Data File: E:\subhangi\SATISH REC. 12  
Method: E:\subhangi\1IPA.met  
Acquired: 1/25/2022 11:25:36 AM  
Printed: 1/25/2022 11:46:50 AM

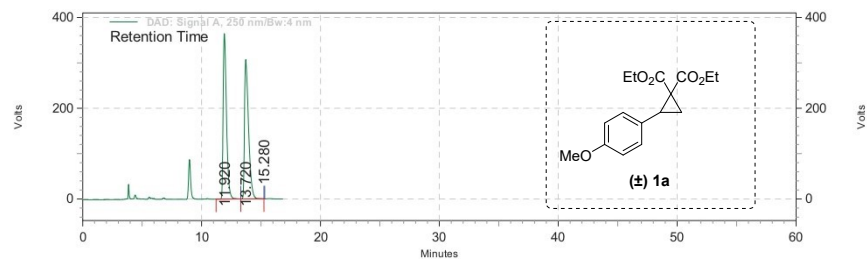

DAD: Signal A,  
250 nm/Bw:4 nm  
Results

| Retention Time | Area     | Area % | Height  | Height % |
|----------------|----------|--------|---------|----------|
| 11.920         | 14852158 | 49.30  | 764247  | 54.28    |
| 13.720         | 15276360 | 50.70  | 643785  | 45.72    |
| 15.280         | 83       | 0.00   | 26      | 0.00     |
| Totals         | 30128601 | 100.00 | 1408058 | 100.00   |

### 2) HPLC of Chiral (1a)

Data File: E:\subhangi\SATISH CHIRAL FFF.dat  
Method: E:\subhangi\1IPA.met  
Acquired: 1/25/2022 4:04:40 PM  
Printed: 1/25/2022 4:32:38 PM

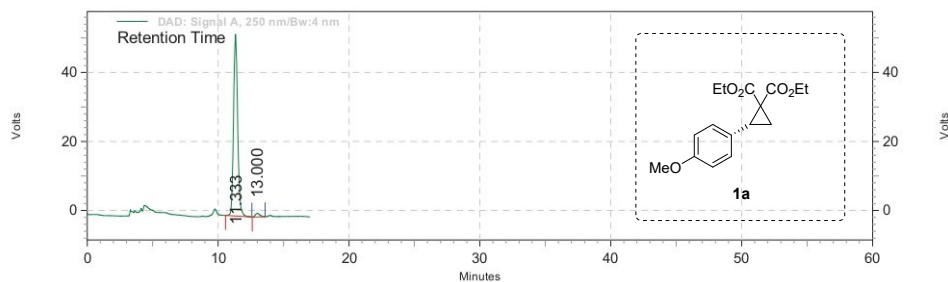

DAD: Signal A,  
250 nm/Bw:4 nm  
Results

| Retention Time | Area    | Area % | Height | Height % |
|----------------|---------|--------|--------|----------|
| 11.333         | 2420424 | 97.86  | 110400 | 98.08    |
| 13.000         | 52818   | 2.14   | 2160   | 1.92     |
| Totals         | 2473242 | 100.00 | 112560 | 100.00   |

## HPLC of (3a)

Data File: E:\subhangi\SATISH PRODUCT RCEMIC 1.dat  
 Method: E:\subhangi\10IPA 90HEXANE.met  
 Acquired: 1/25/2022 5:39:05 PM  
 Printed: 1/25/2022 6:04:37 PM

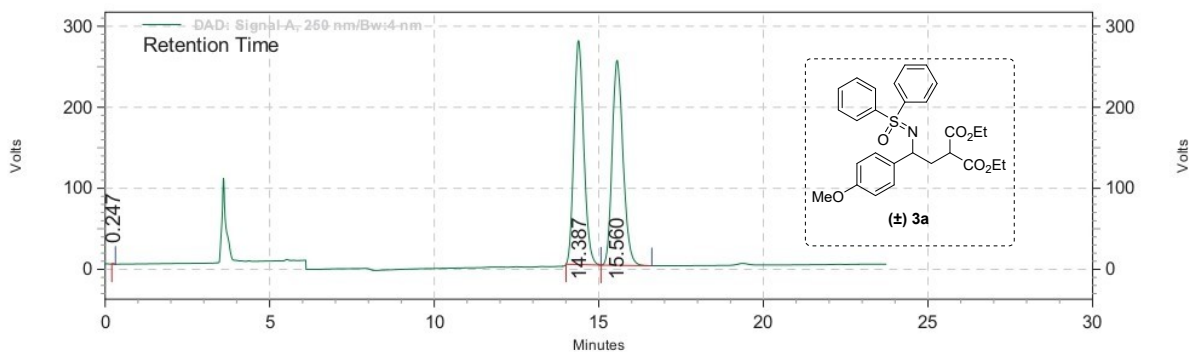

### DAD: Signal A, 250 nm/Bw:4 nm Results

| Retention Time | Area     | Area % | Height  | Height % |
|----------------|----------|--------|---------|----------|
| 0.247          | 3119     | 0.01   | 1307    | 0.12     |
| 14.387         | 12060902 | 49.59  | 578977  | 52.14    |
| 15.560         | 12256585 | 50.40  | 530080  | 47.74    |
| Totals         | 24320606 | 100.00 | 1110364 | 100.00   |





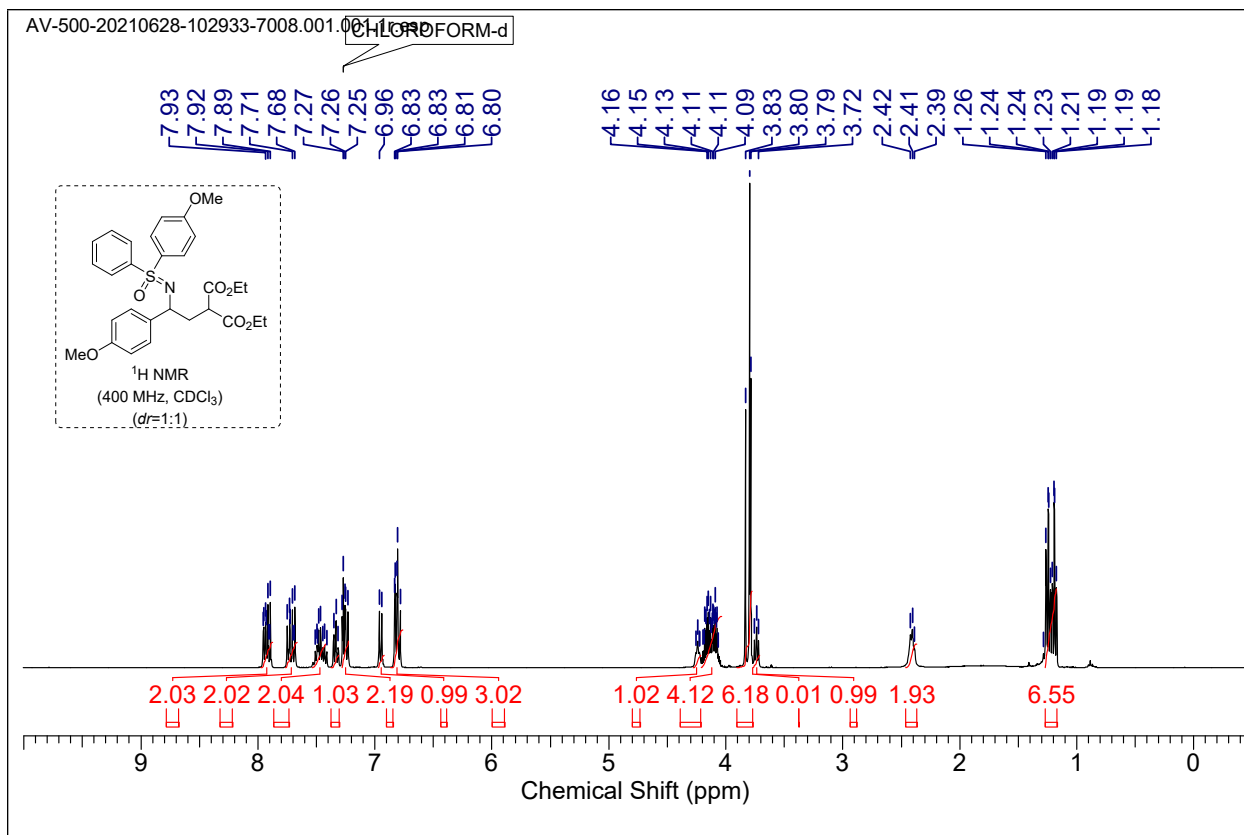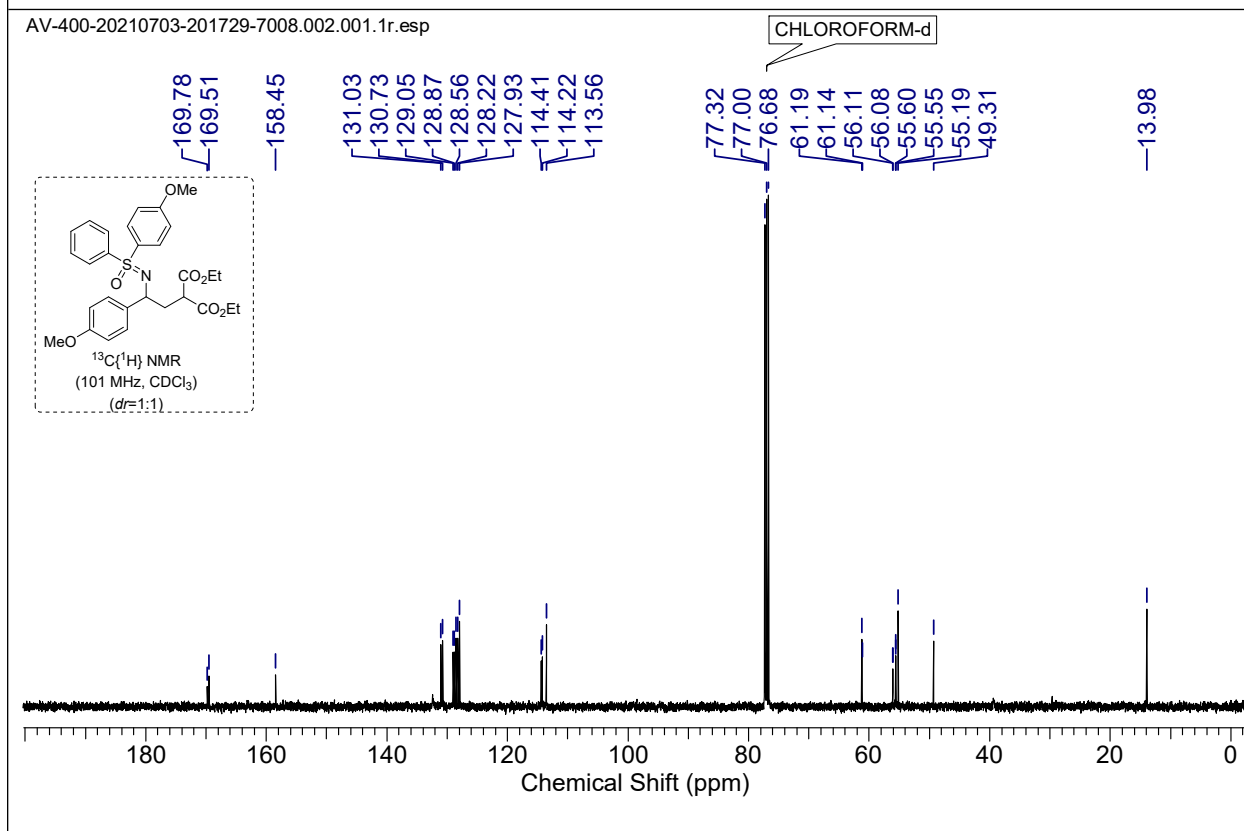

**Diethyl 2-(2-(4-methoxyphenyl)-2-(((4-methoxyphenyl) (oxo)(phenyl)-l6-sulfaneylidene)**

amino) ethyl) malonate (3b)

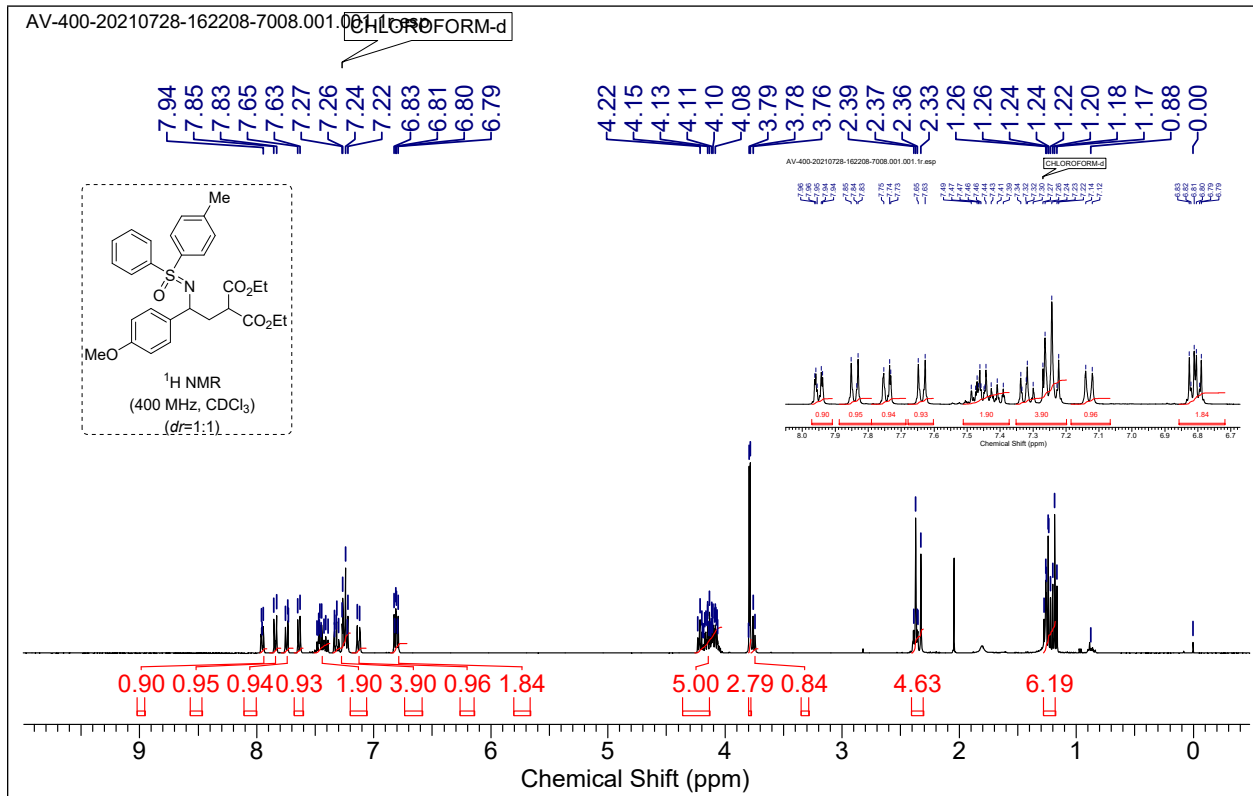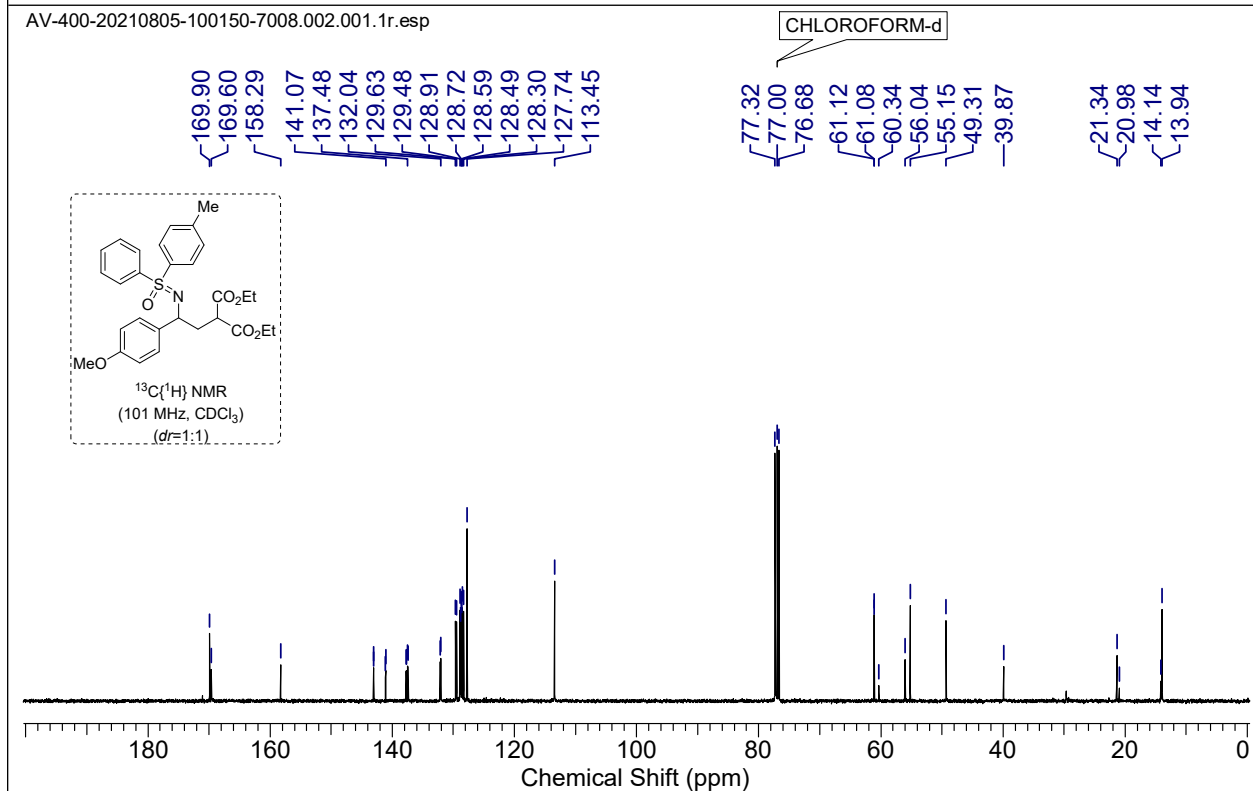

**Diethyl 2-(2-(4-methoxyphenyl)-2-((oxo(phenyl)(*p*-tolyl)-1 $\beta$ -sulfaneylidene) amino) ethyl) malonate (3c)**

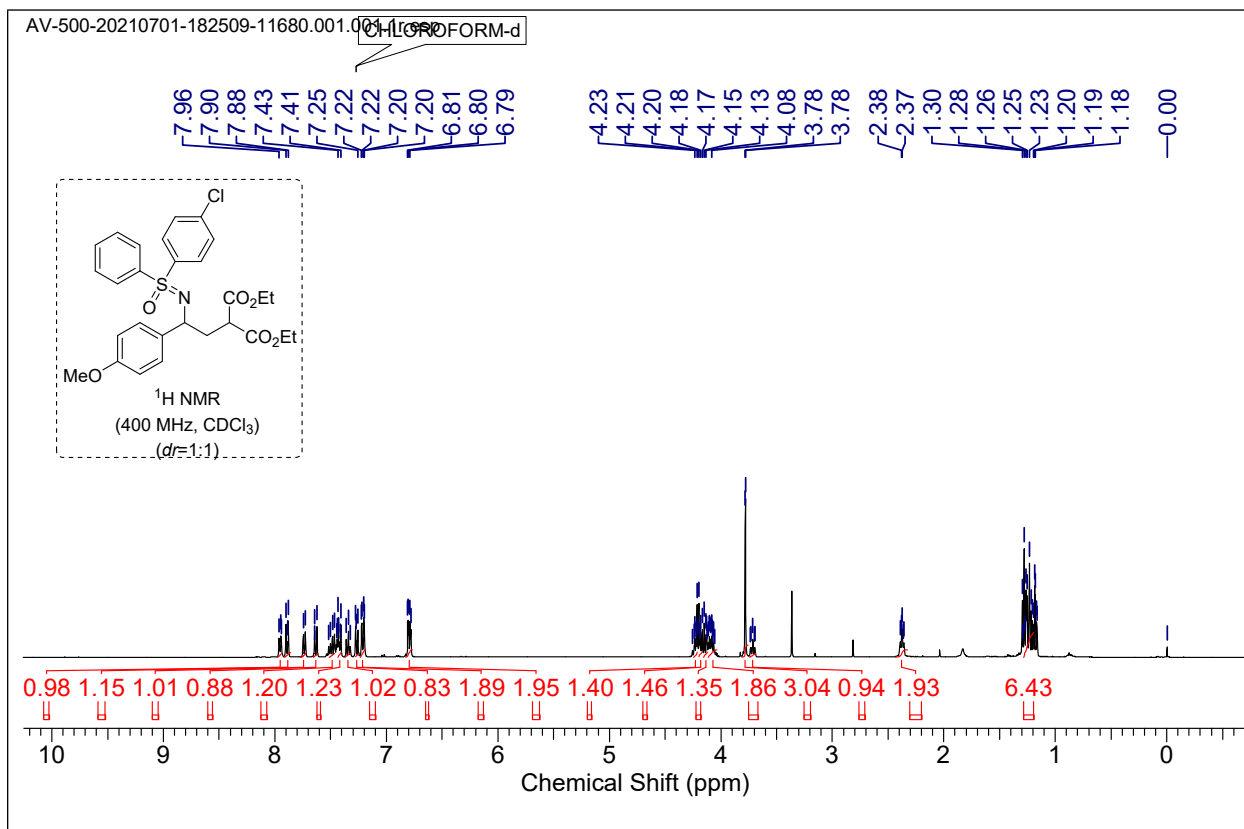

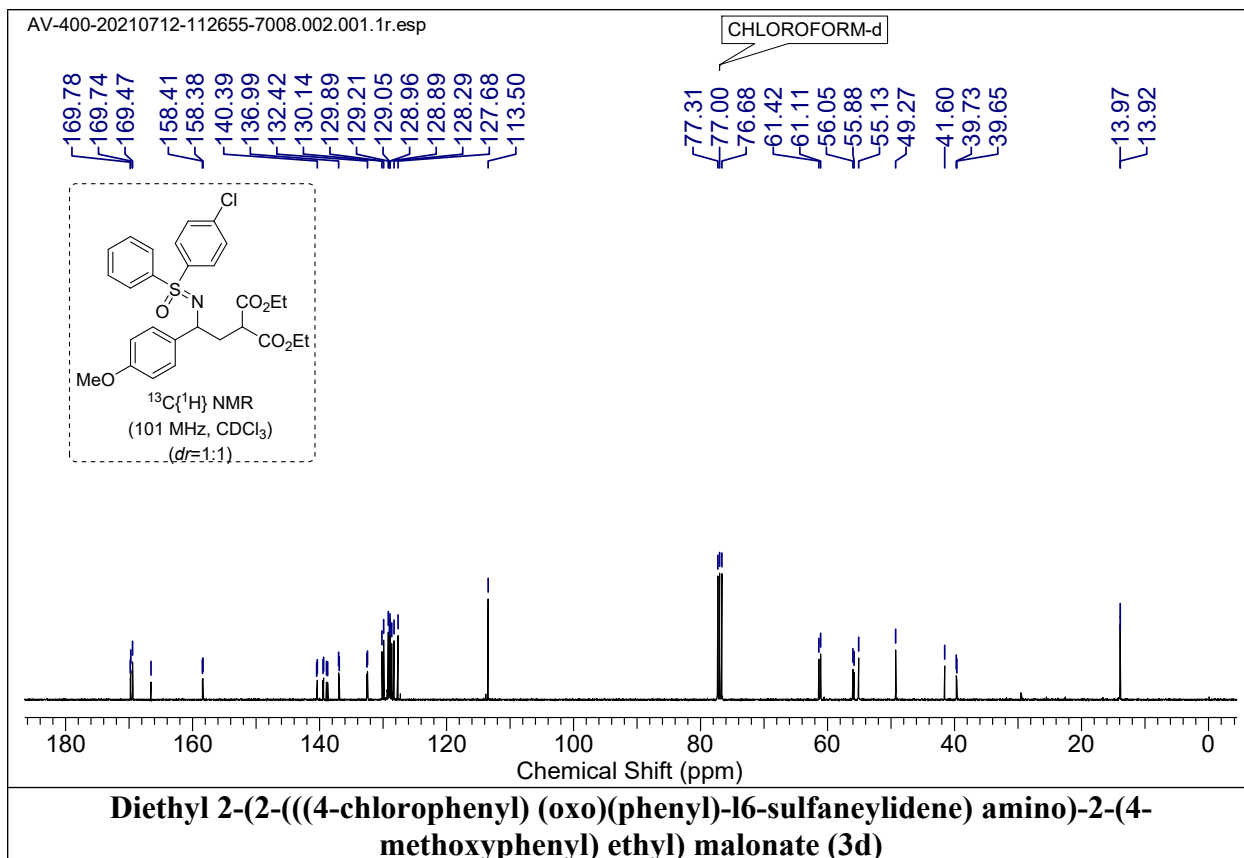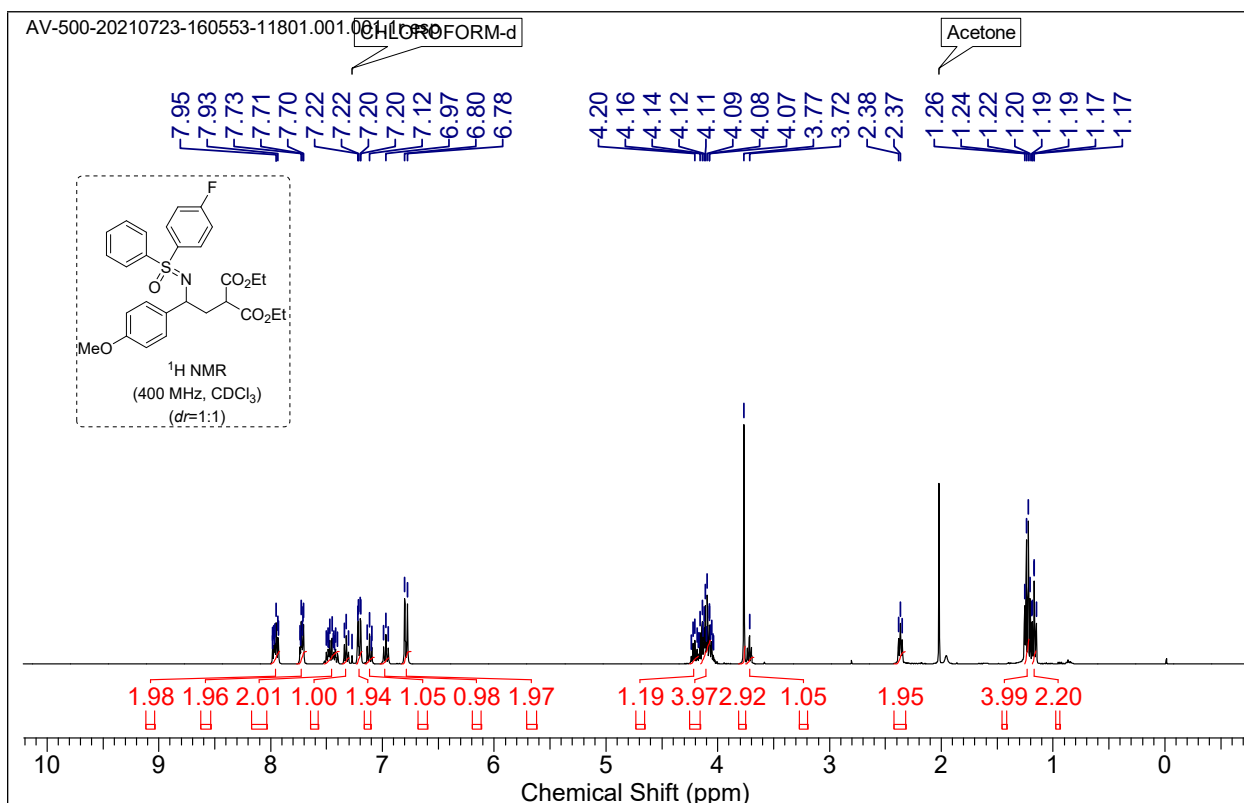

AV-400-20210727-172201-11680.003.001.1r.esp

CHLOROFORM-d

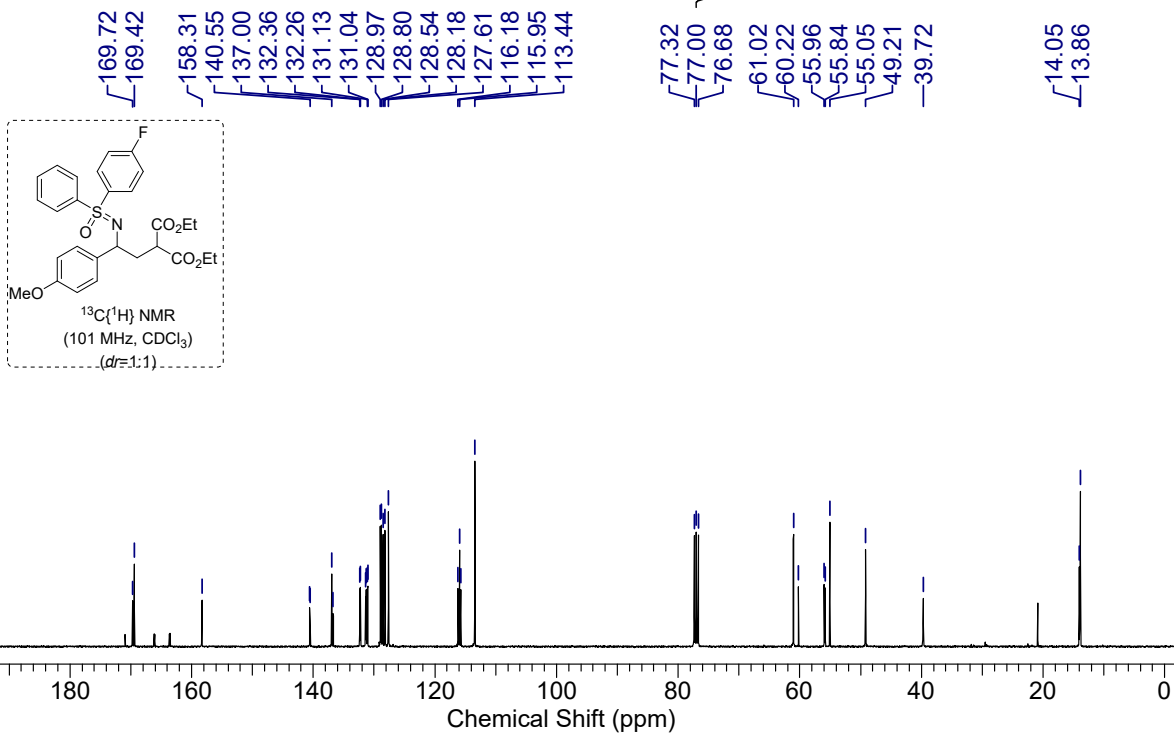

AV-400-20210727-172201-11680.002.001.1r.esp

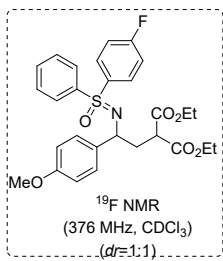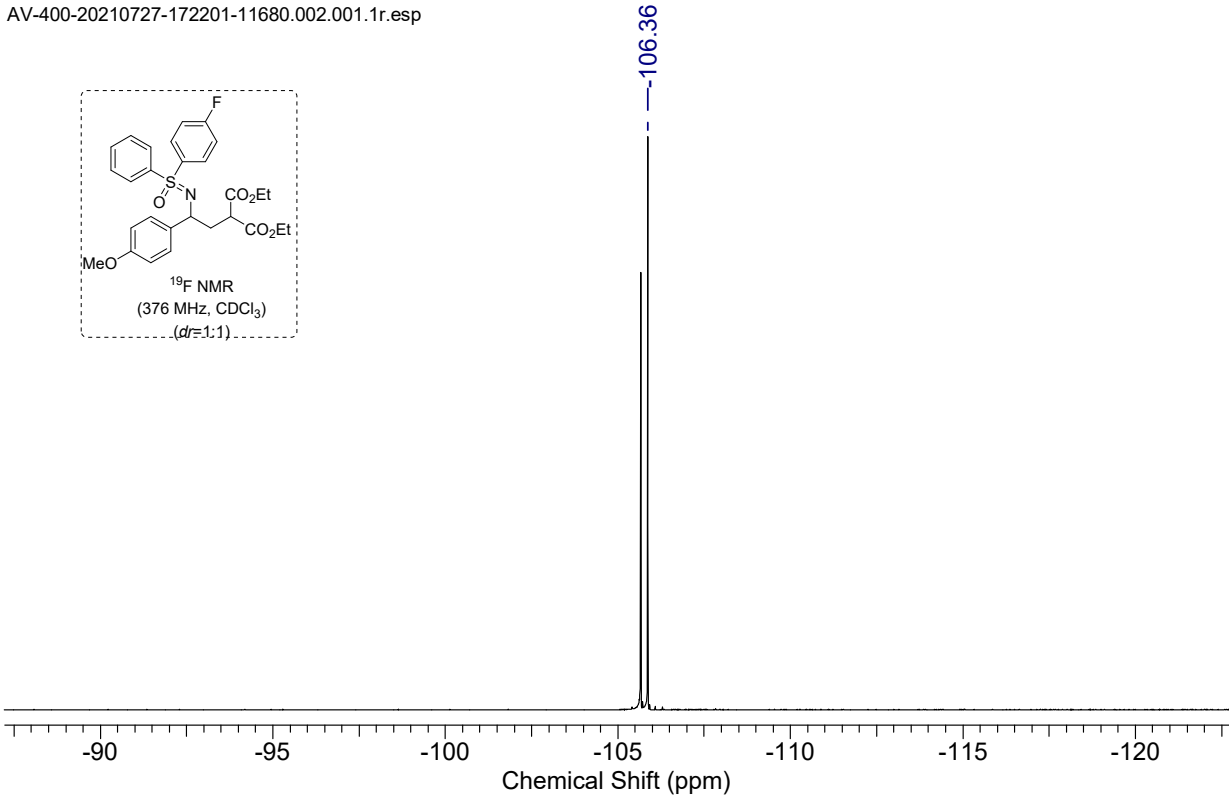

**Diethyl 2-(((4-fluorophenyl) (oxo)(phenyl)-l6-sulfaneylidene) amino)-2-(4-methoxyphenyl) ethyl) malonate (3e)**

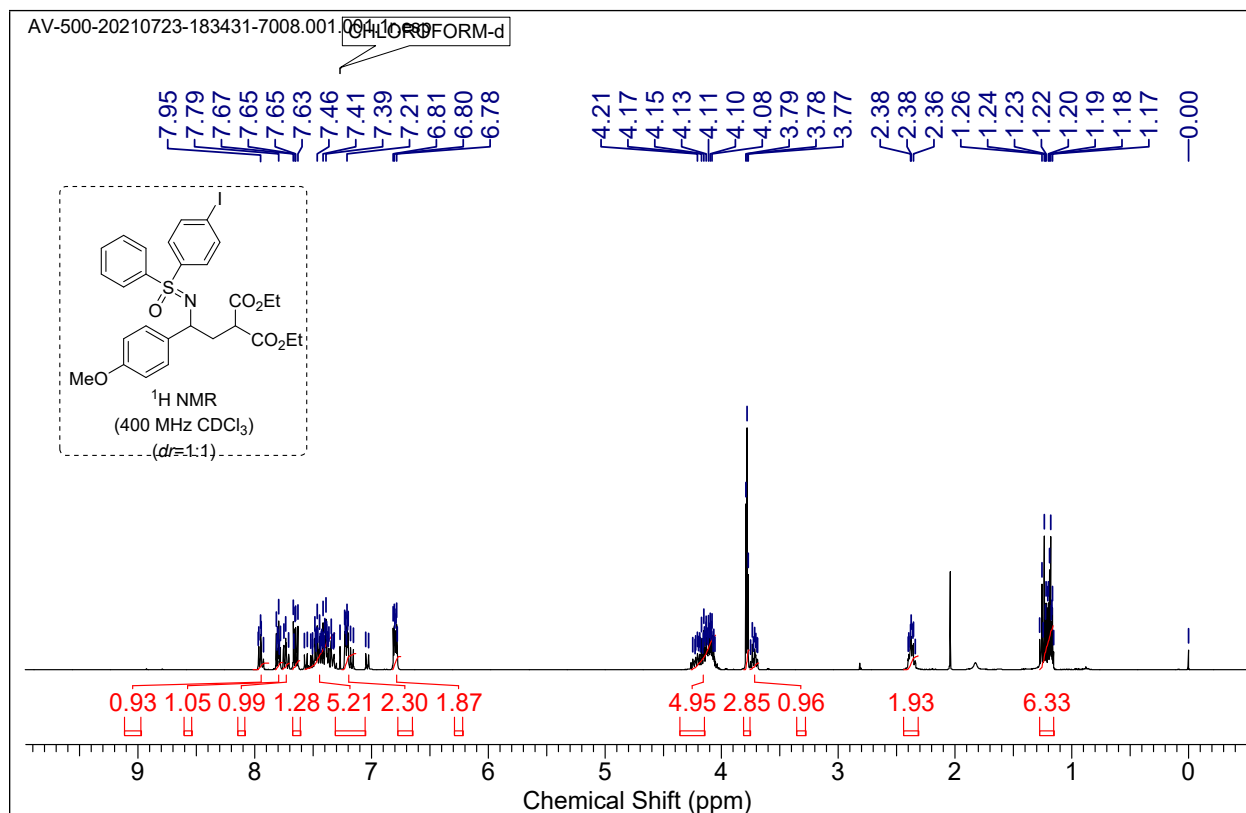

AV-500-20210723-183431-7008.002.001.1r.esp

CHLOROFORM-d

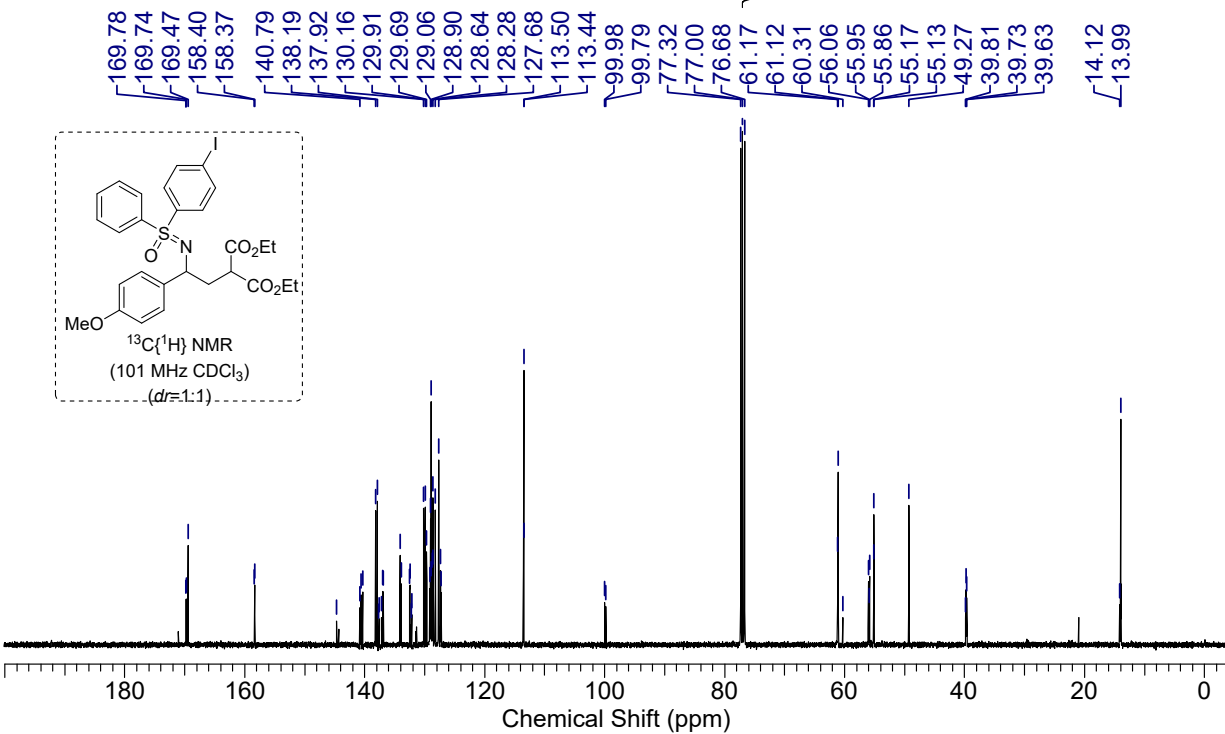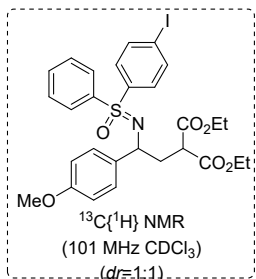

**Diethyl 2-(2-(((4-iodophenyl) (oxo)(phenyl)-16-sulfaneylidene) amino)-2-(4-methoxyphenyl) ethyl) malonate (3f)**

AV-500-20210728-162247-7008.001.001.1r.esp CHLOROFORM-d

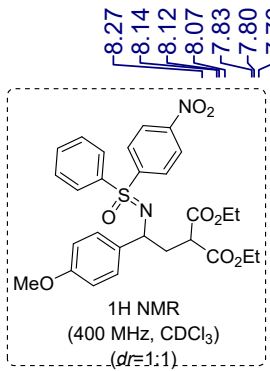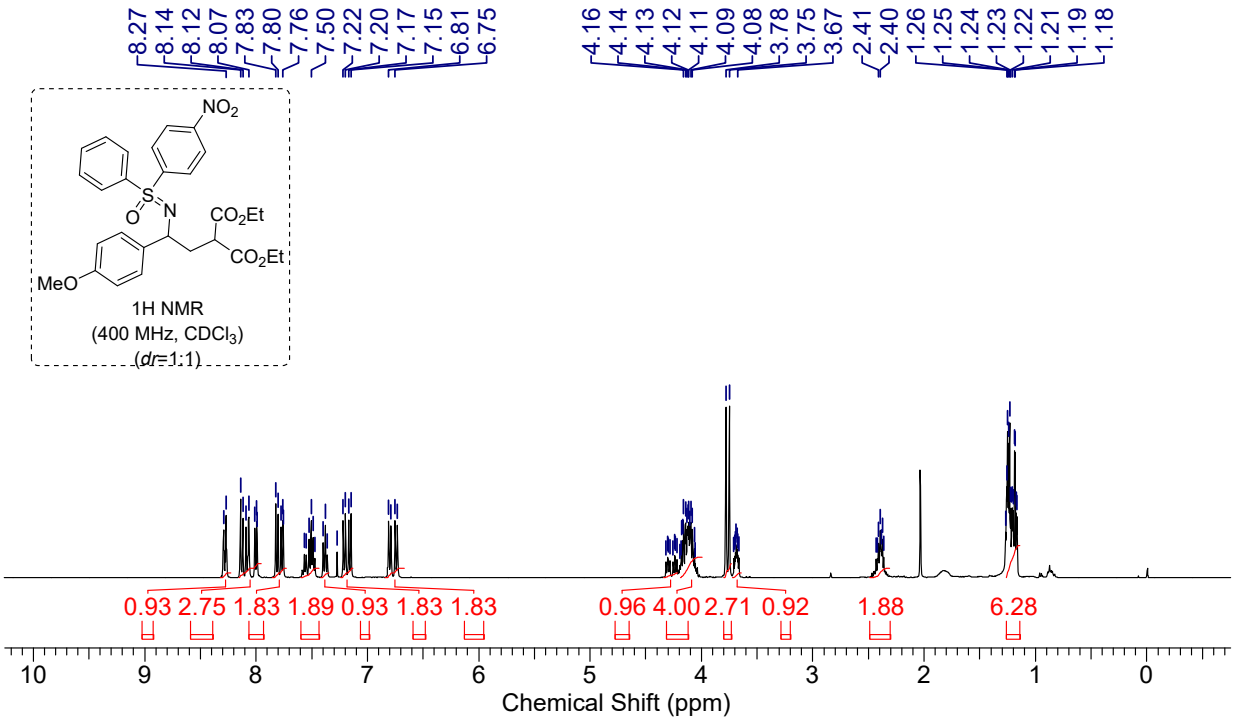

AV-400-20210728-160618-11801.001.001.1r.esp

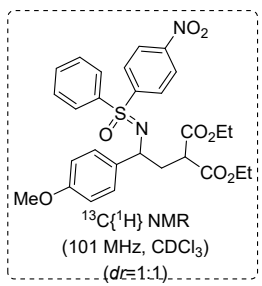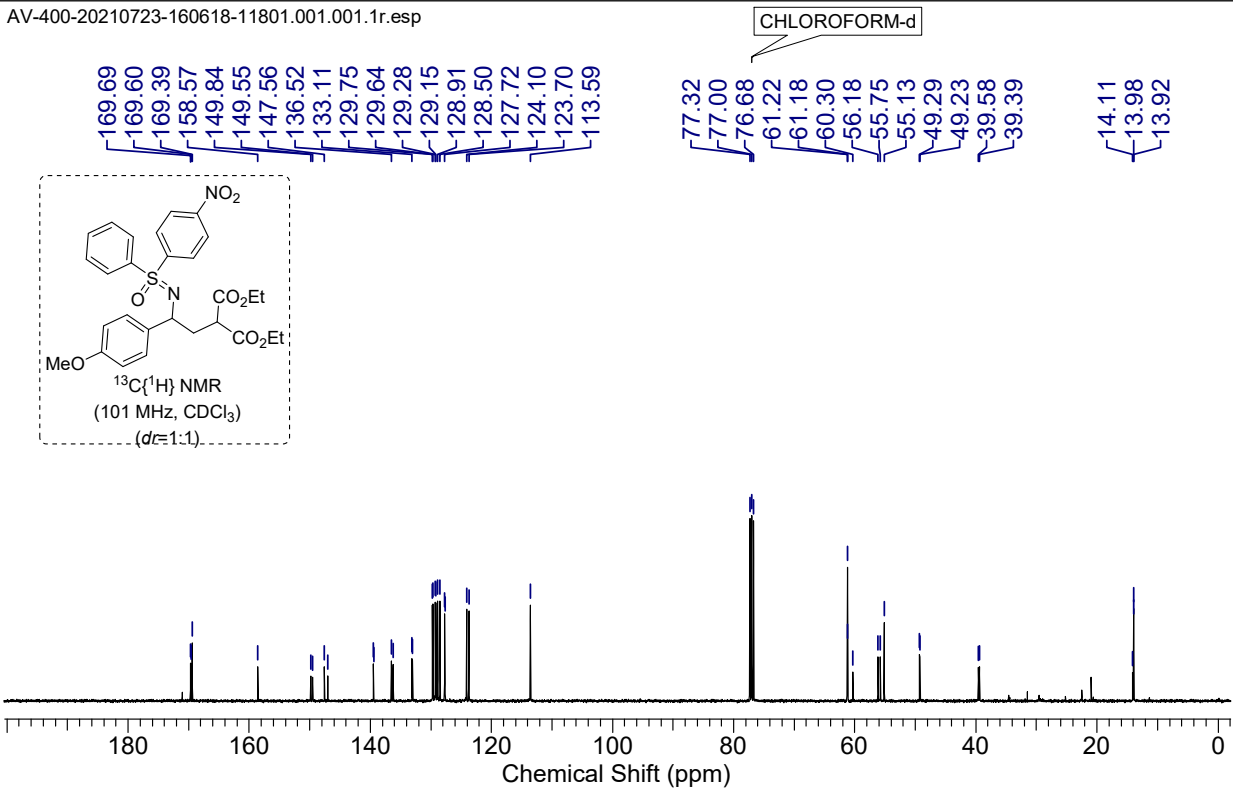

**Diethyl 2-(2-(4-methoxyphenyl)-2-((4-nitrophenyl)(oxo)(phenyl)-16-sulfaneylidene) amino) ethyl malonate (3g)**



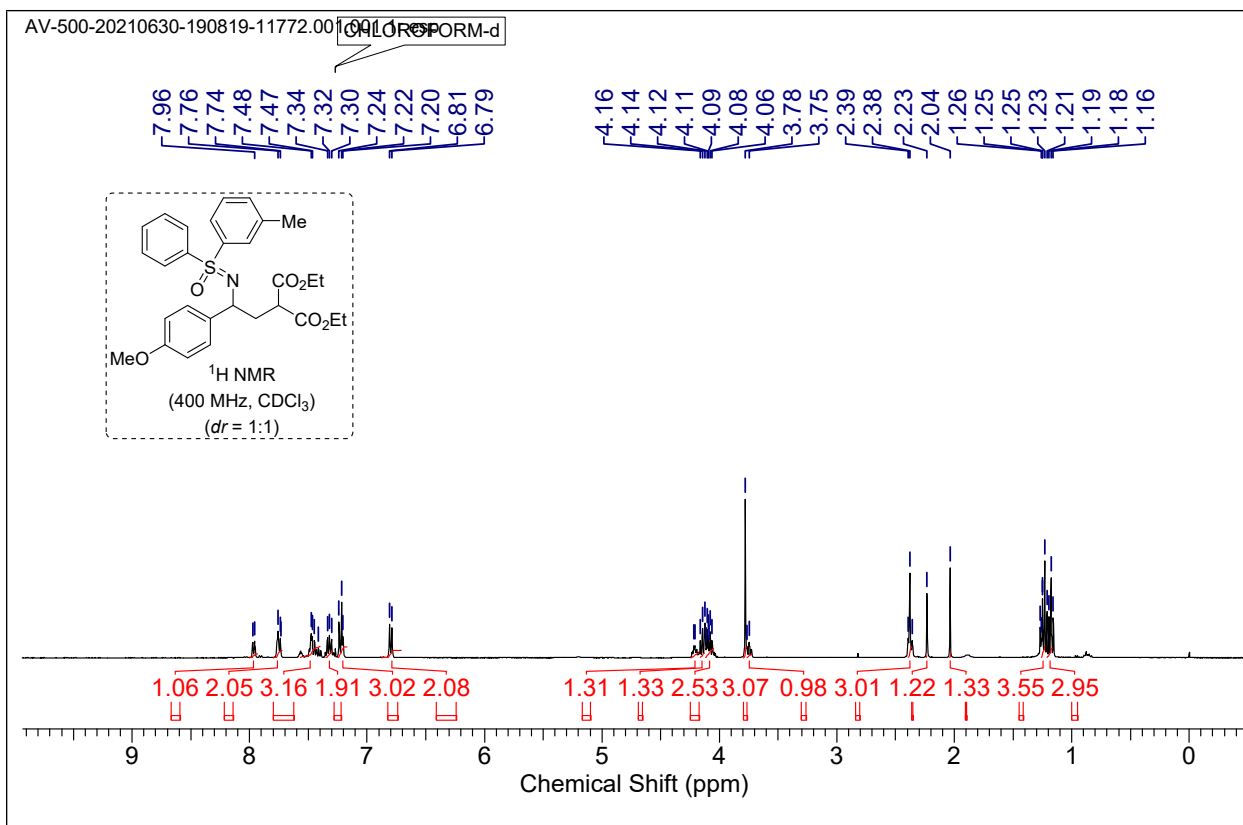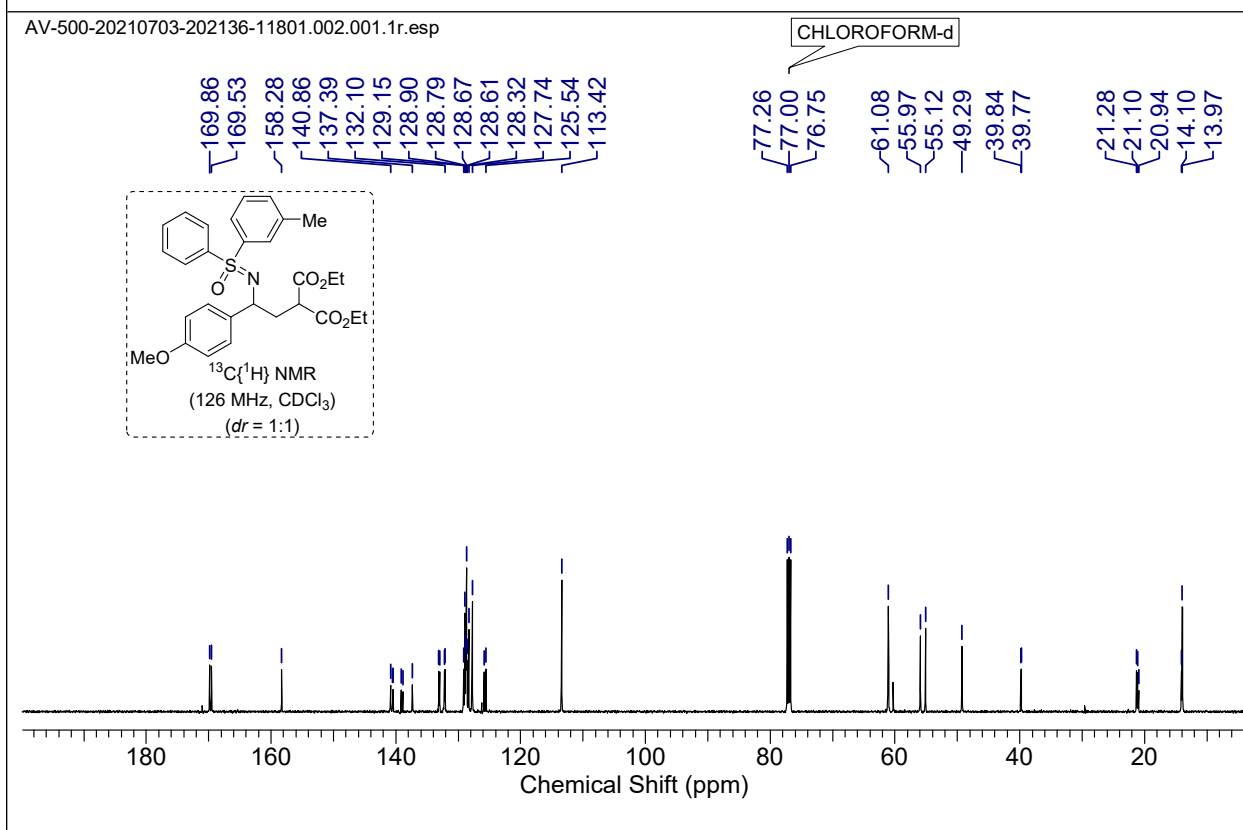

**Diethyl 2-(2-(4-methoxyphenyl)-2-((oxo(phenyl)(*m*-tolyl)-16-sulfaneylidene) amino) ethyl) malonate (3h)**

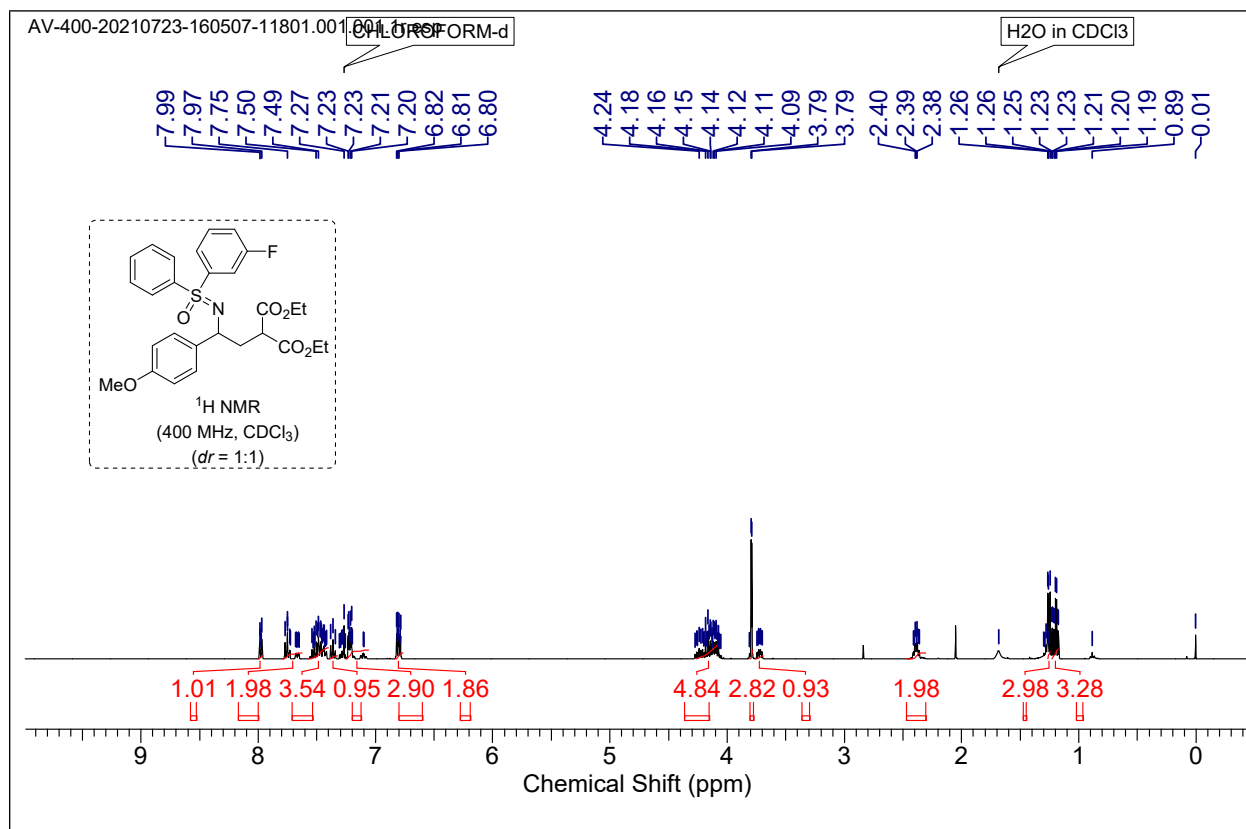

AV-500-20210726-113652-11801.002.001.1r.esp

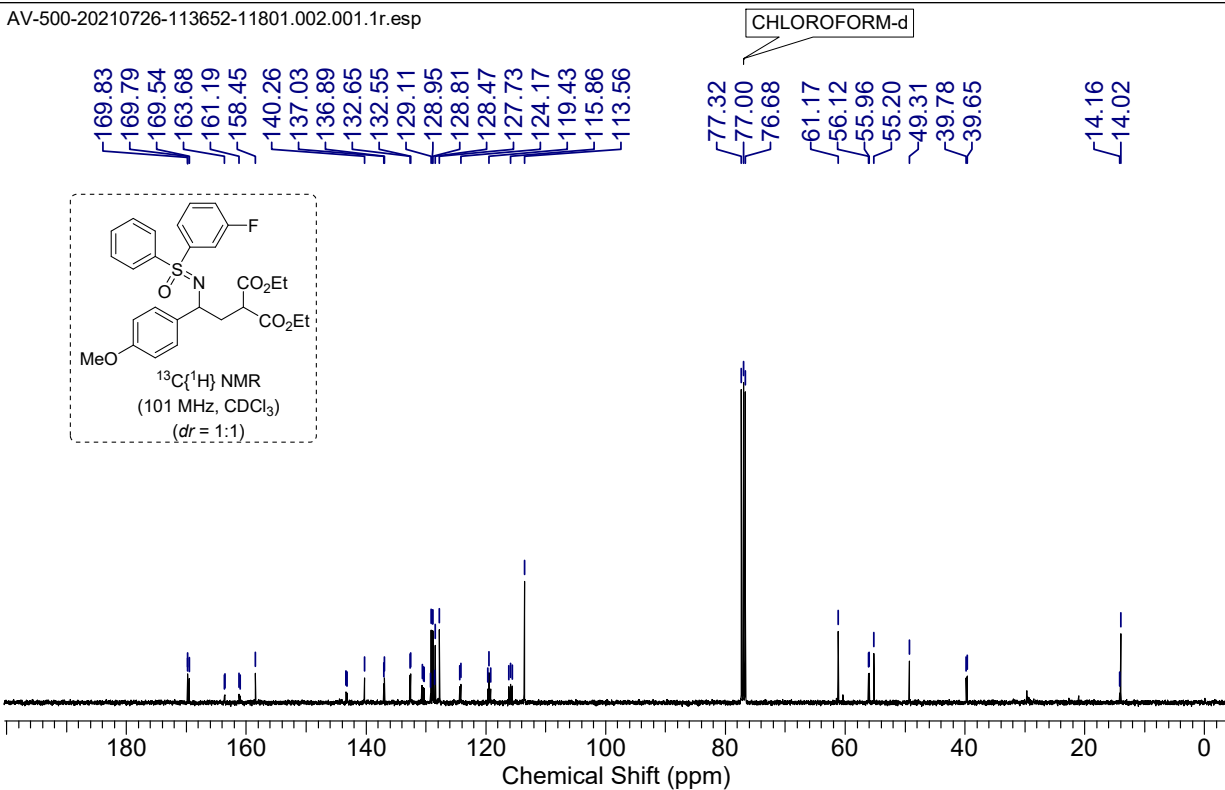

AV-400-20210728-162312-7008.001.001.1r.esp

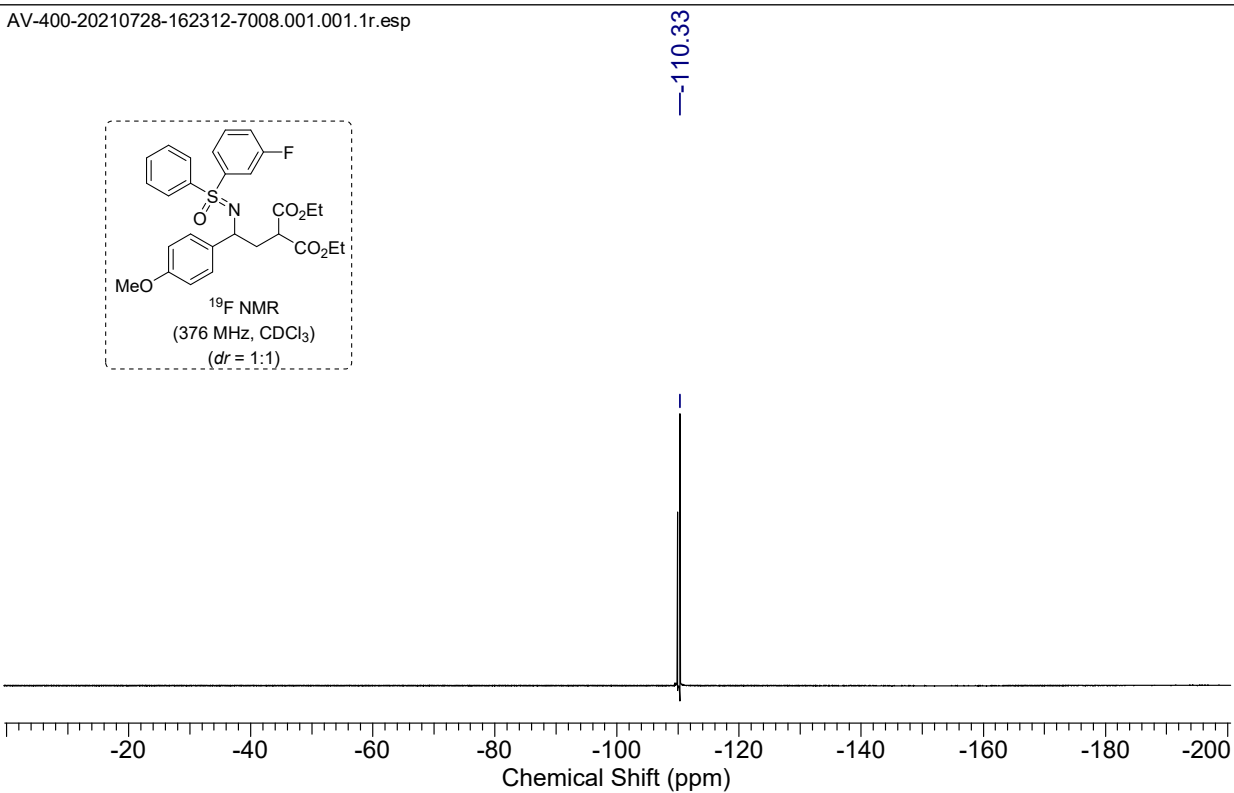

**Diethyl 2-(2-(((3-fluorophenyl) (oxo)(phenyl)-l6-sulfaneylidene) amino)-2-(4-methoxyphenyl) ethyl) malonate (3i)**

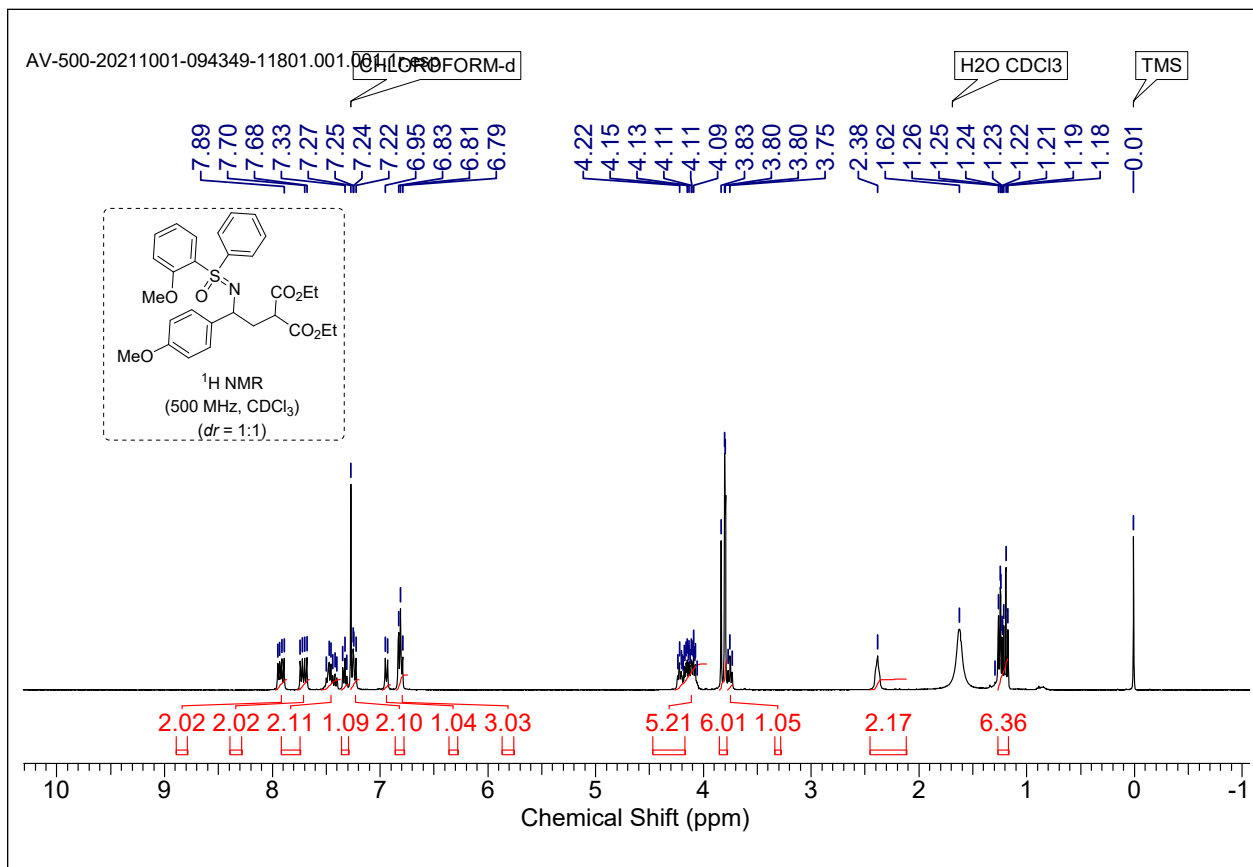

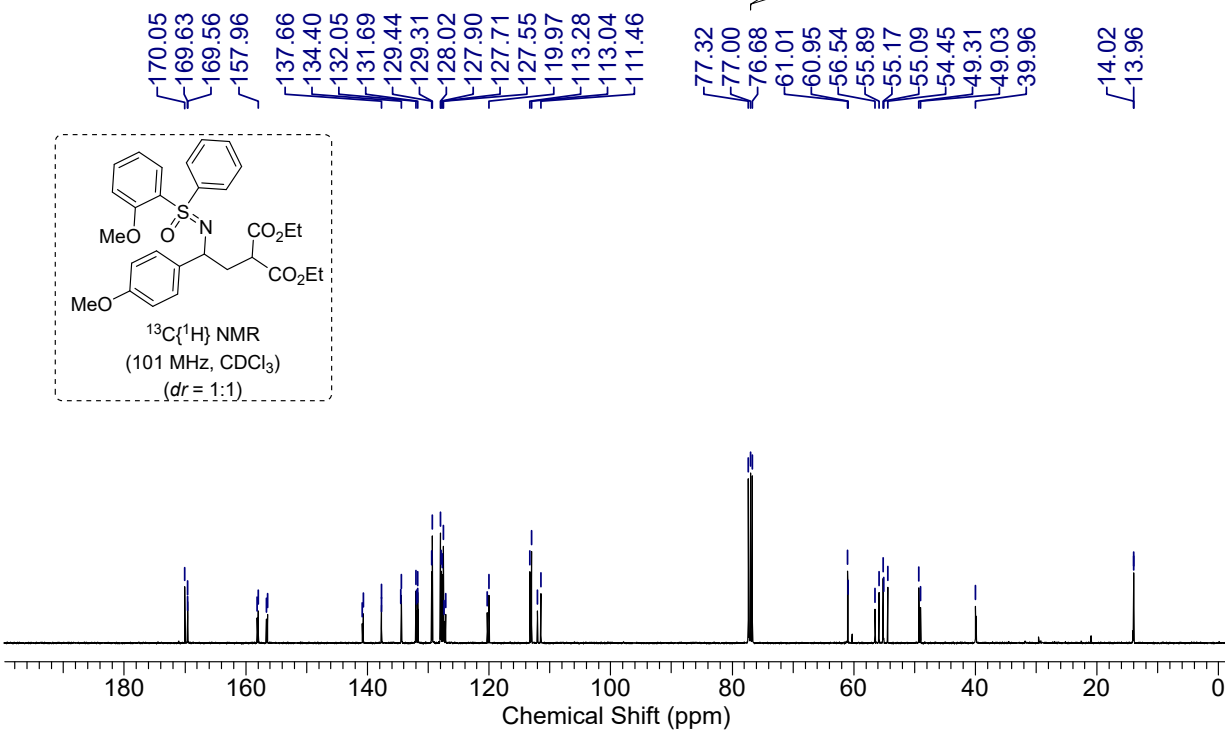

**Diethyl 2-(2-(4-methoxyphenyl)-2-(((2-methoxyphenyl) (oxo)(phenyl)-16-sulfanylidene) amino) ethyl) malonate (3j)**

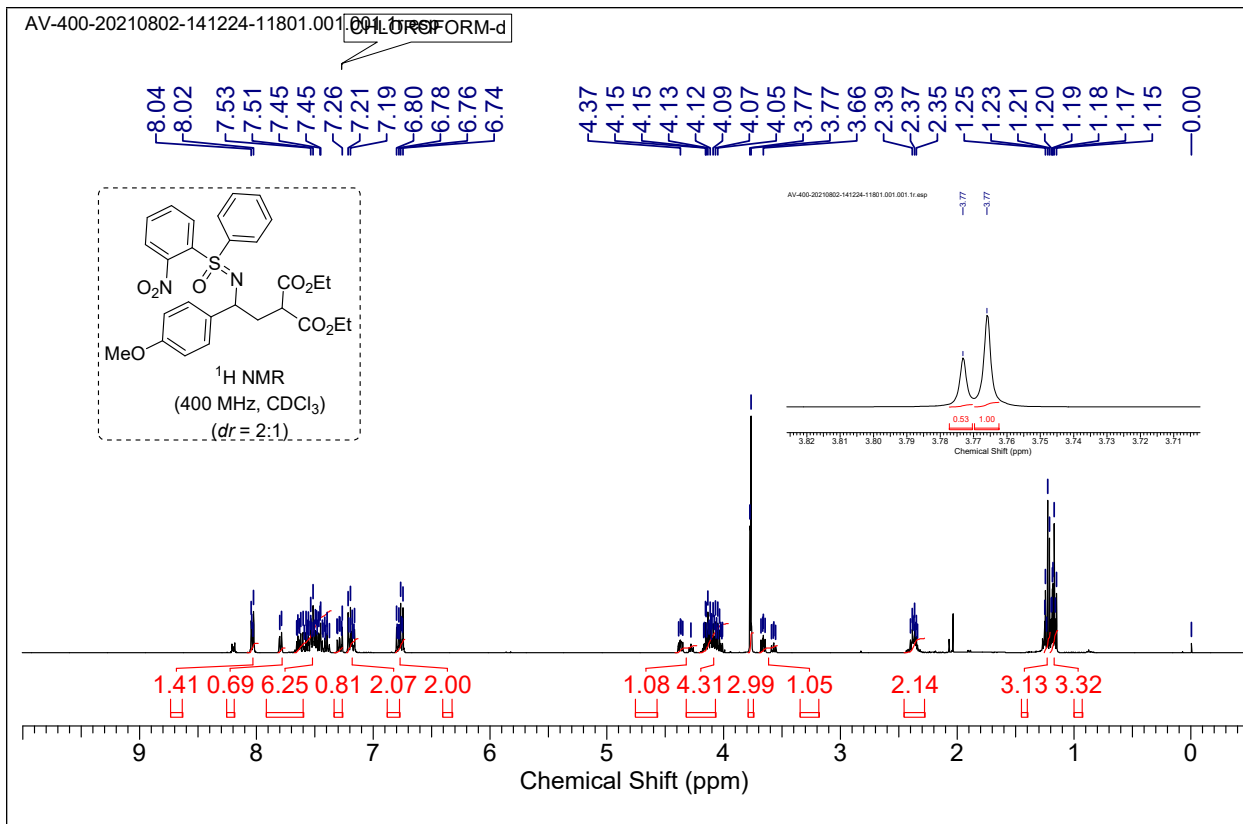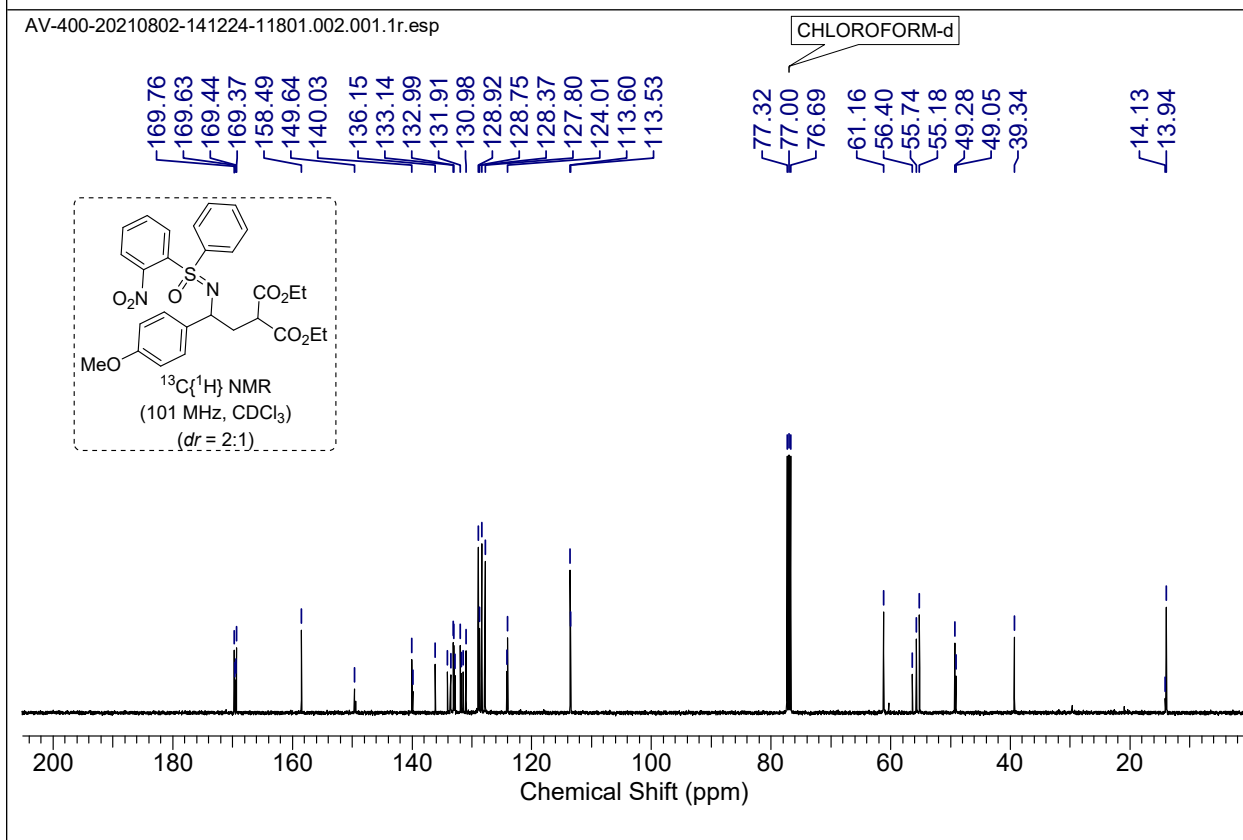

**Diethyl 2-(2-(4-methoxyphenyl)-2-(((2-nitrophenyl)(oxo)(phenyl)-16-sulfaneylidene)**

amino) ethyl) malonate (3k)

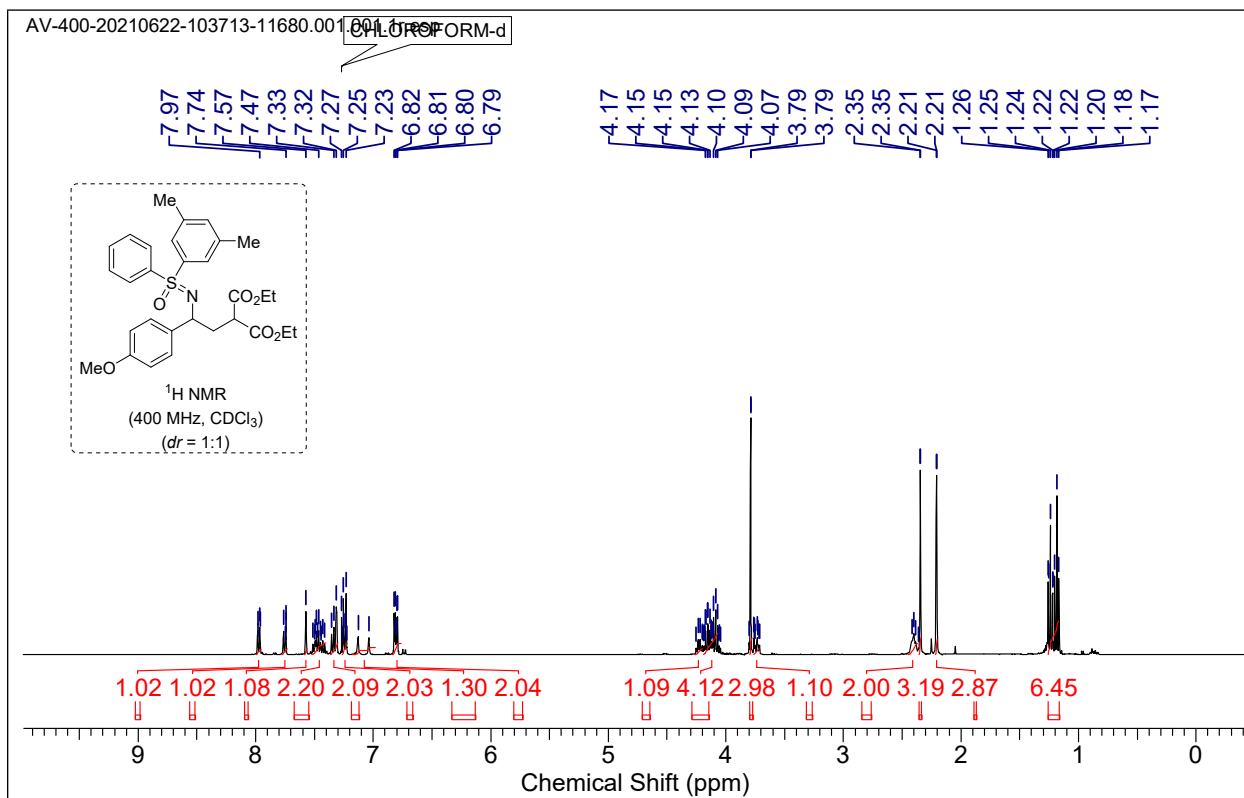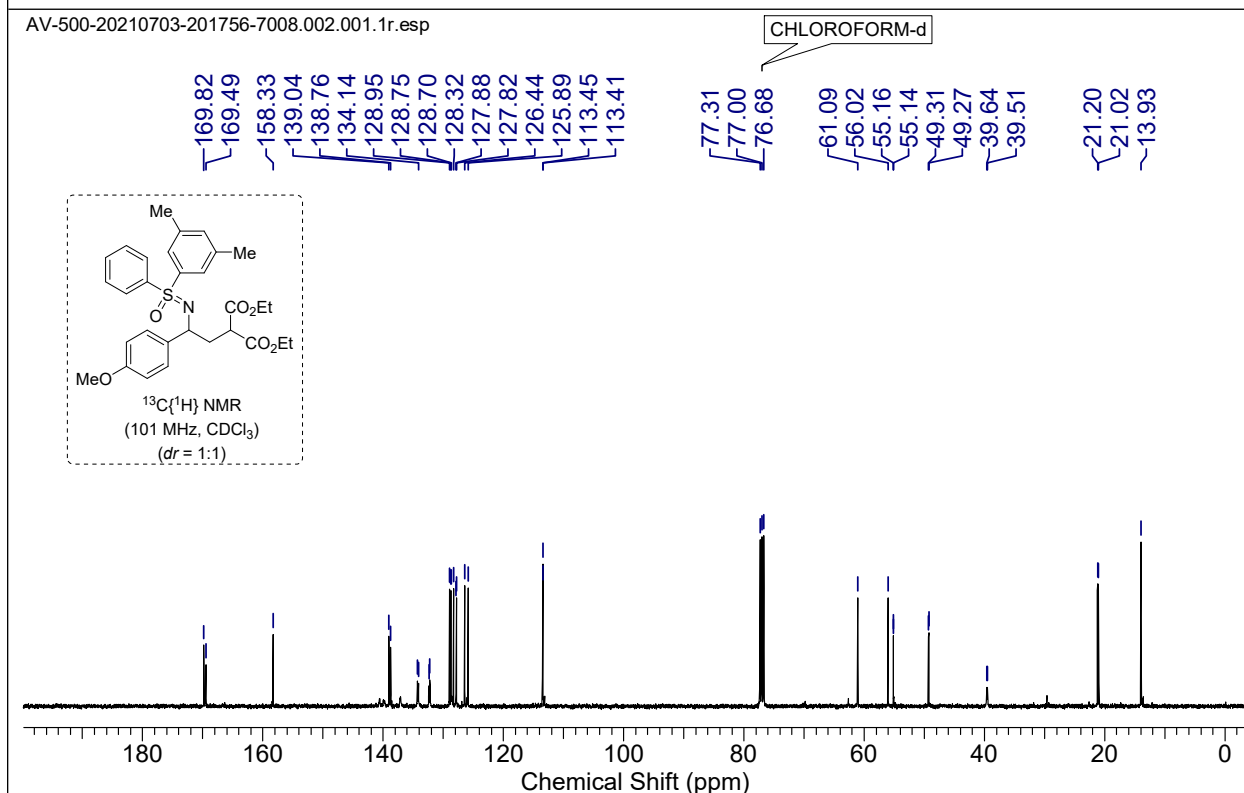

**Diethyl 2-(2-(((3,5-dimethylphenyl) (oxo)(phenyl)-l6-sulfaneylidene) amino)-2-(4-methoxyphenyl) ethyl) malonate (3l)**

AV-400-20210614-204305-13120000.00400109RM-d

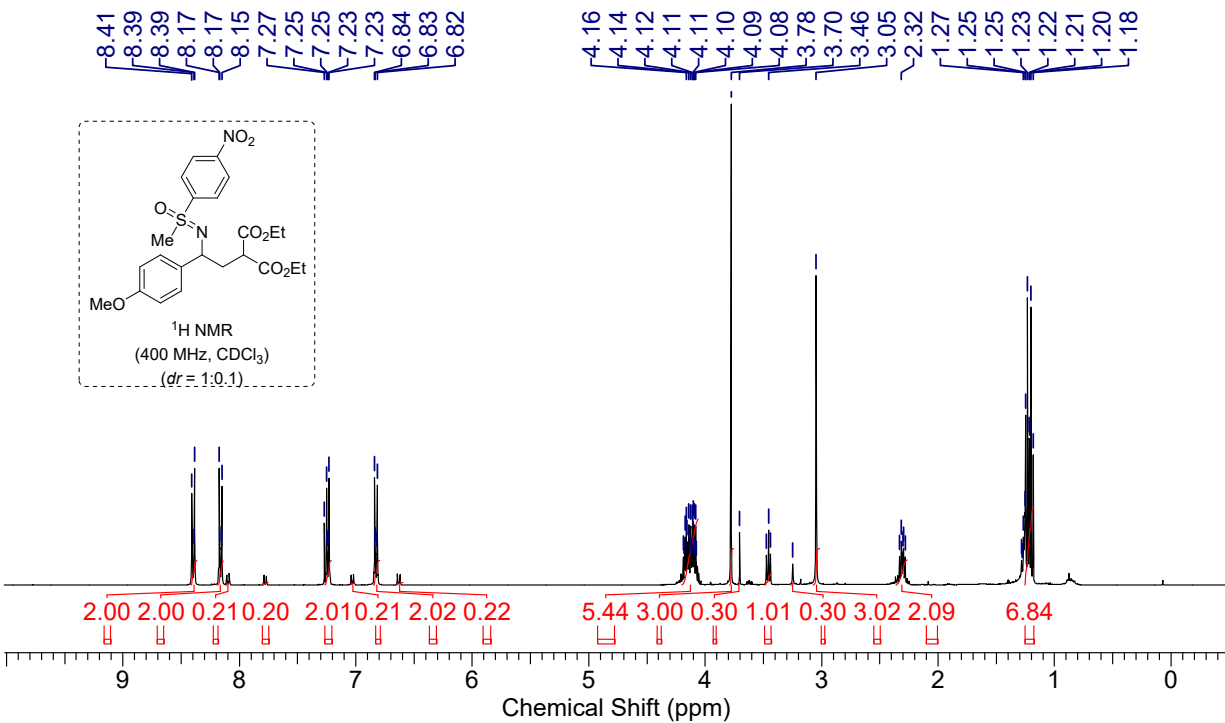



AV-400-20210614-204305-13120000.002.001.1r.esp

CHLOROFORM-d

169.45  
169.29  
158.74  
150.42  
145.59  
136.00  
129.71  
129.60  
128.06  
127.69  
124.40  
123.83  
113.78  
113.54

77.32  
77.00  
76.68  
61.30  
61.25  
56.40  
55.15  
49.41  
44.62  
38.98

13.99  
13.96

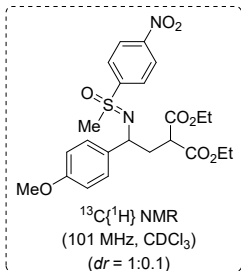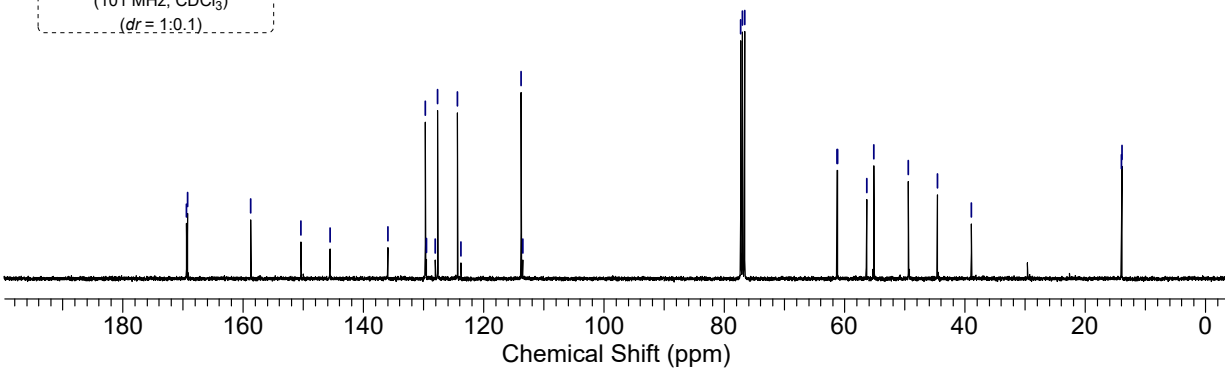

**Diethyl 2-(2-(4-methoxyphenyl)-2-((methyl(4-nitrophenyl) (oxo)-16-sulfaneylidene) amino) ethyl) malonate (3m)**

AV-400-20210617-101335-7008.001.001.1r.esp CHLOROFORM-d

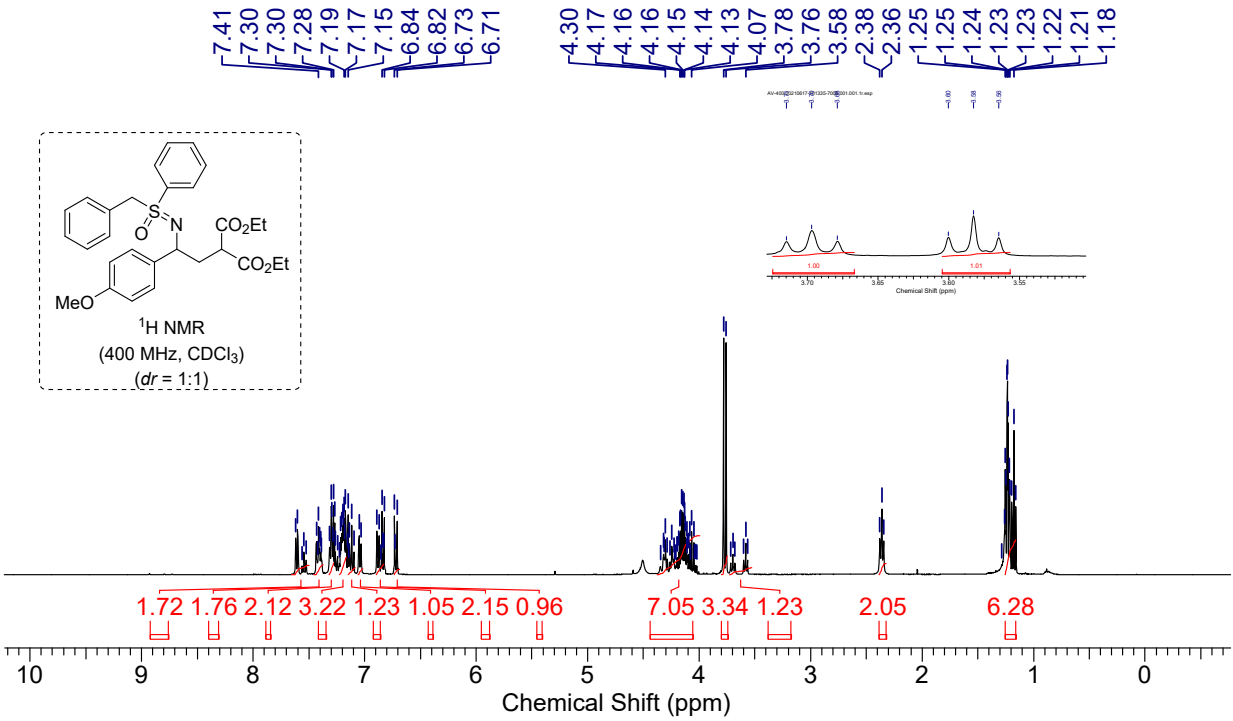

AV-400-20210617-101335-7008.002.001.1r.esp

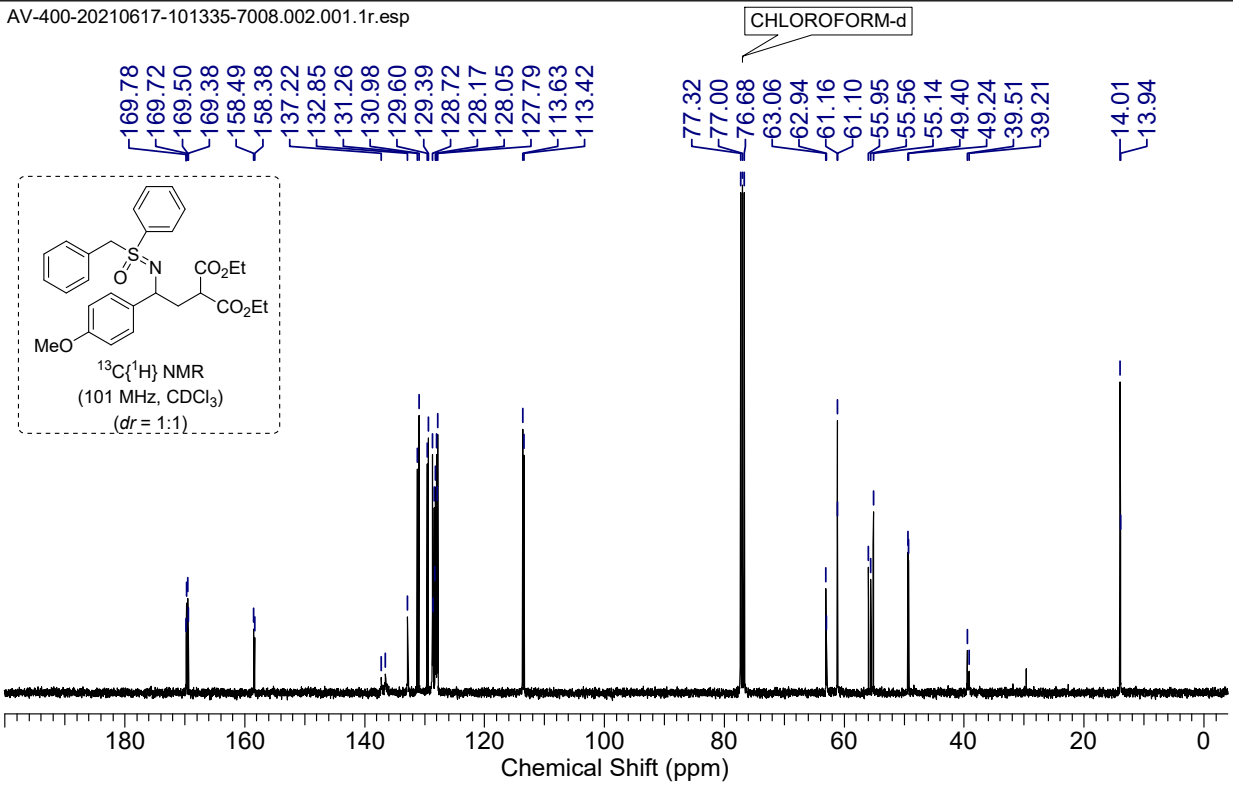

**Diethyl 2-(2-((benzyl(oxo)(phenyl)-l6-sulfaneylidene) amino)-2-(4-methoxyphenyl) ethyl) malonate (3n)**

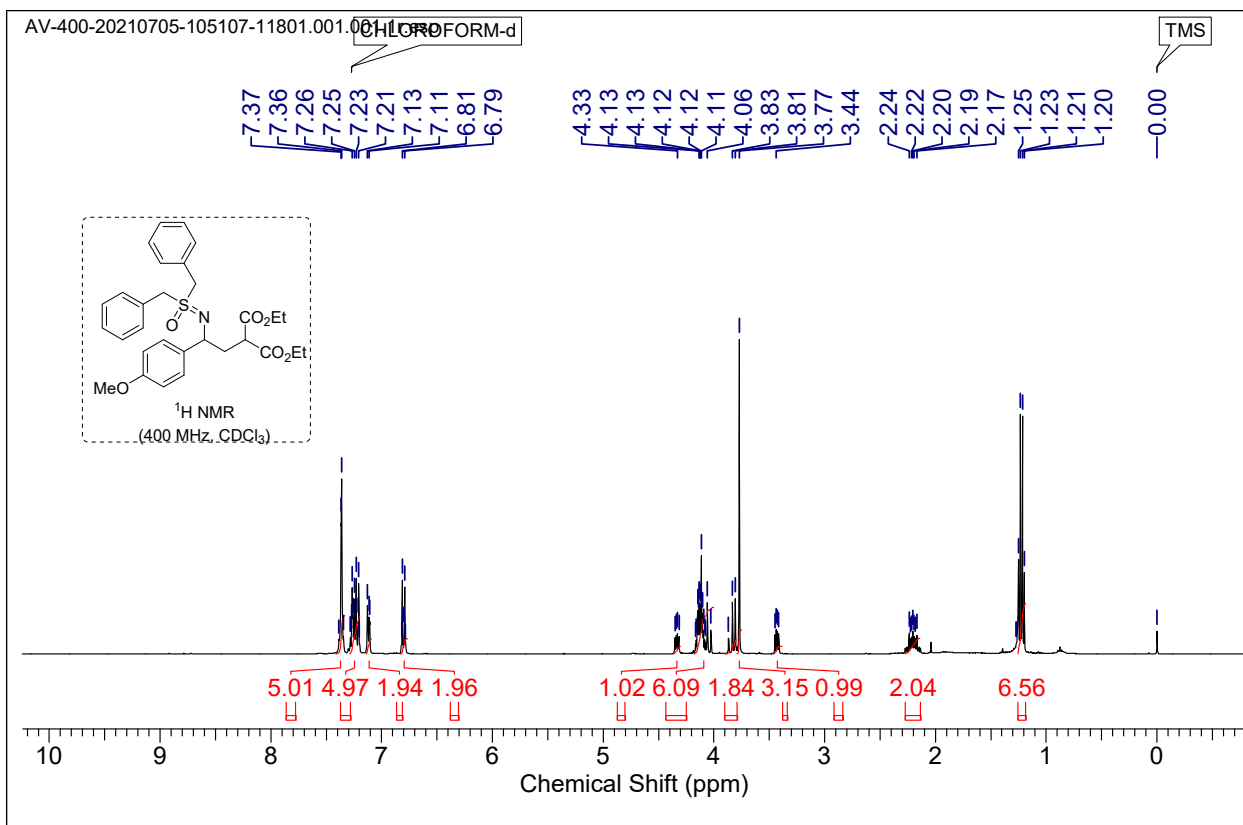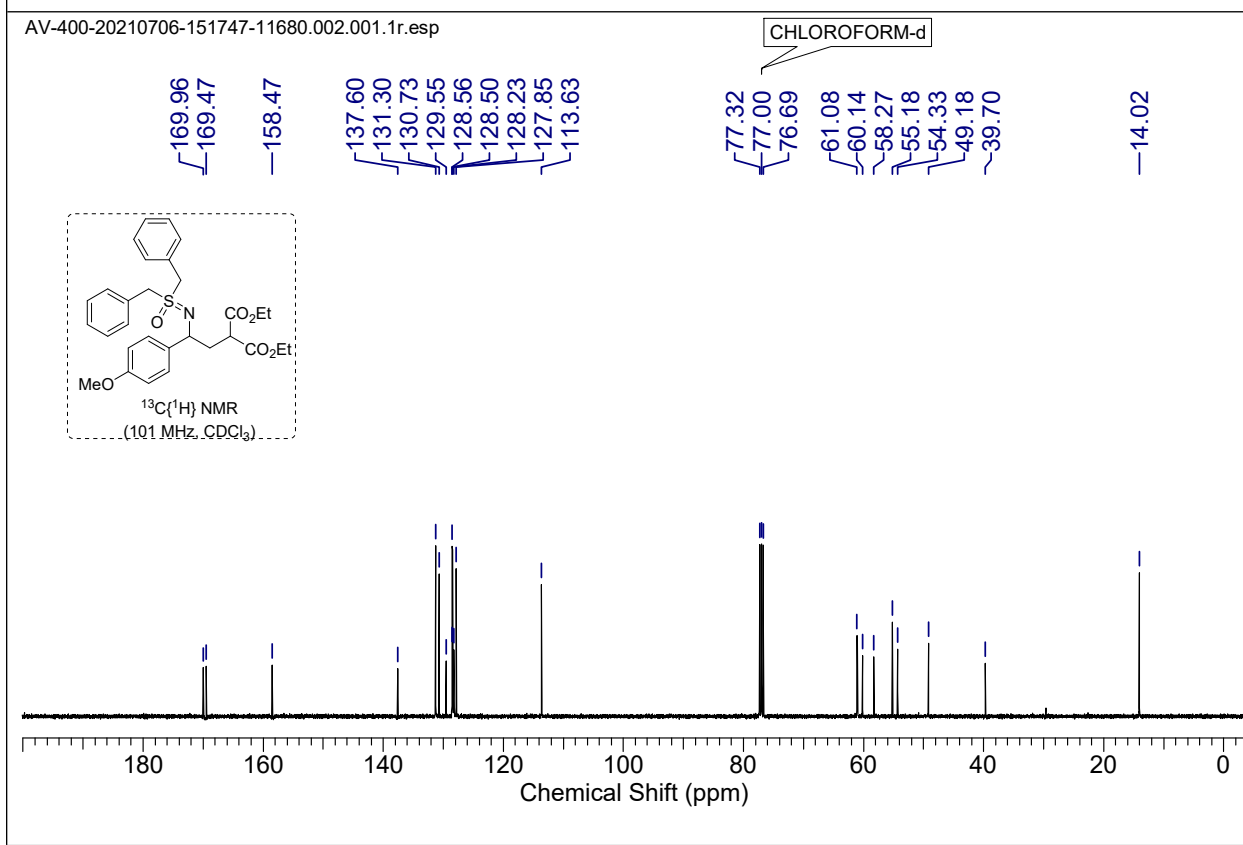



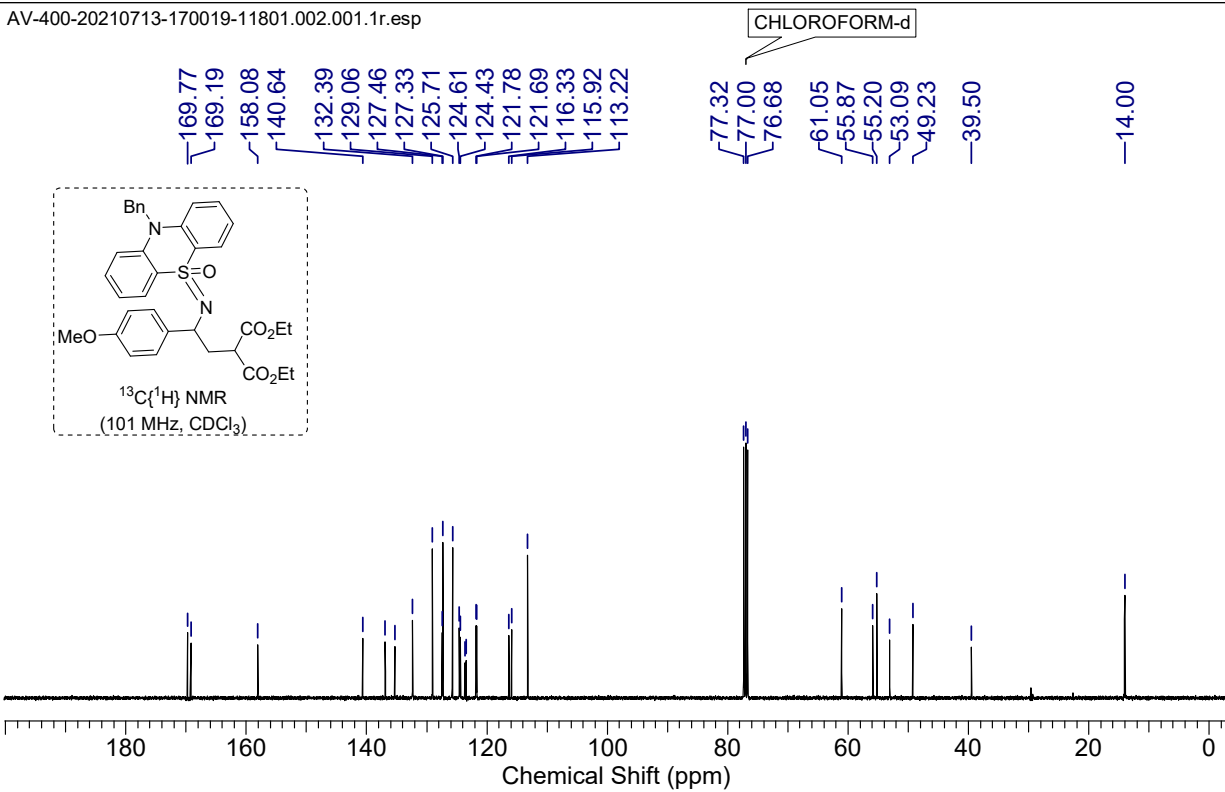

**Diethyl 2-(2-((10-benzyl-5-oxido-10H-5λ4-phenothiazin-5-ylidene) amino)-2-(4-methoxyphenyl) ethyl) malonate (3p)**

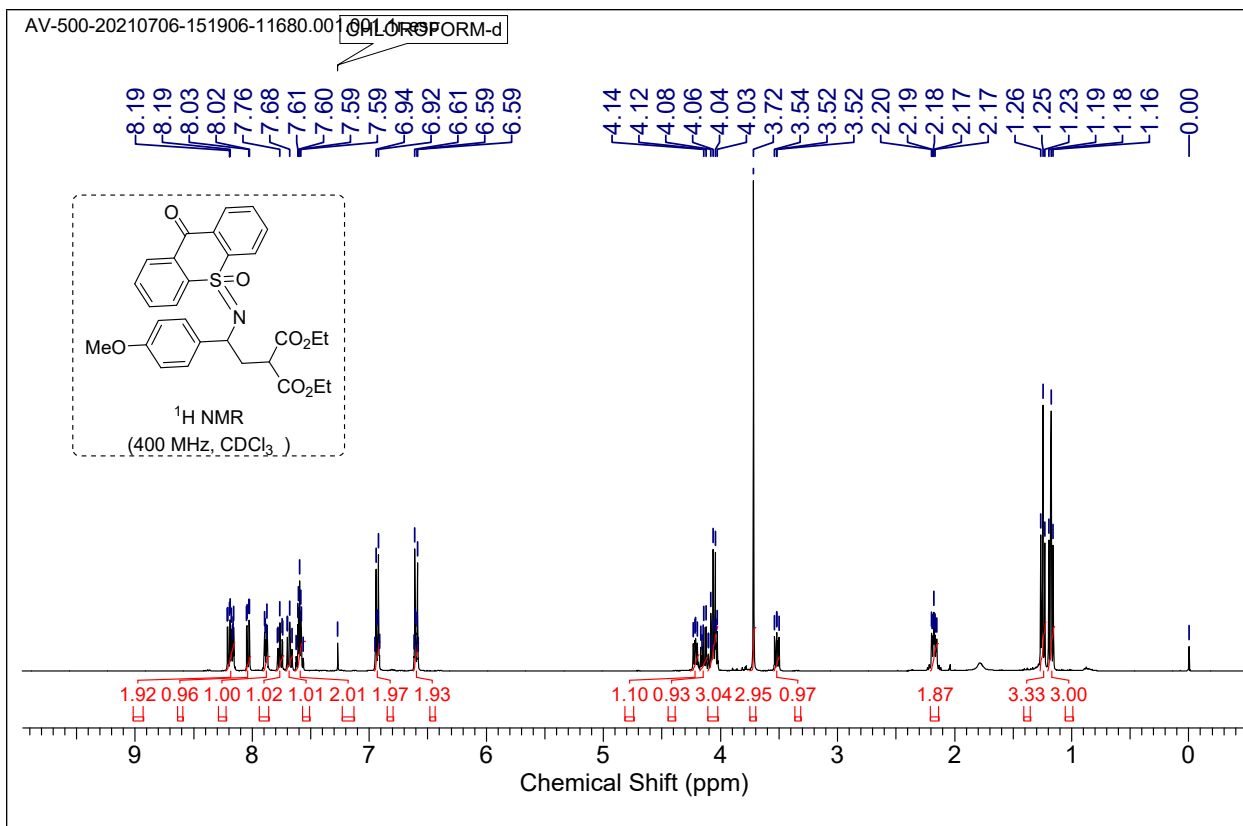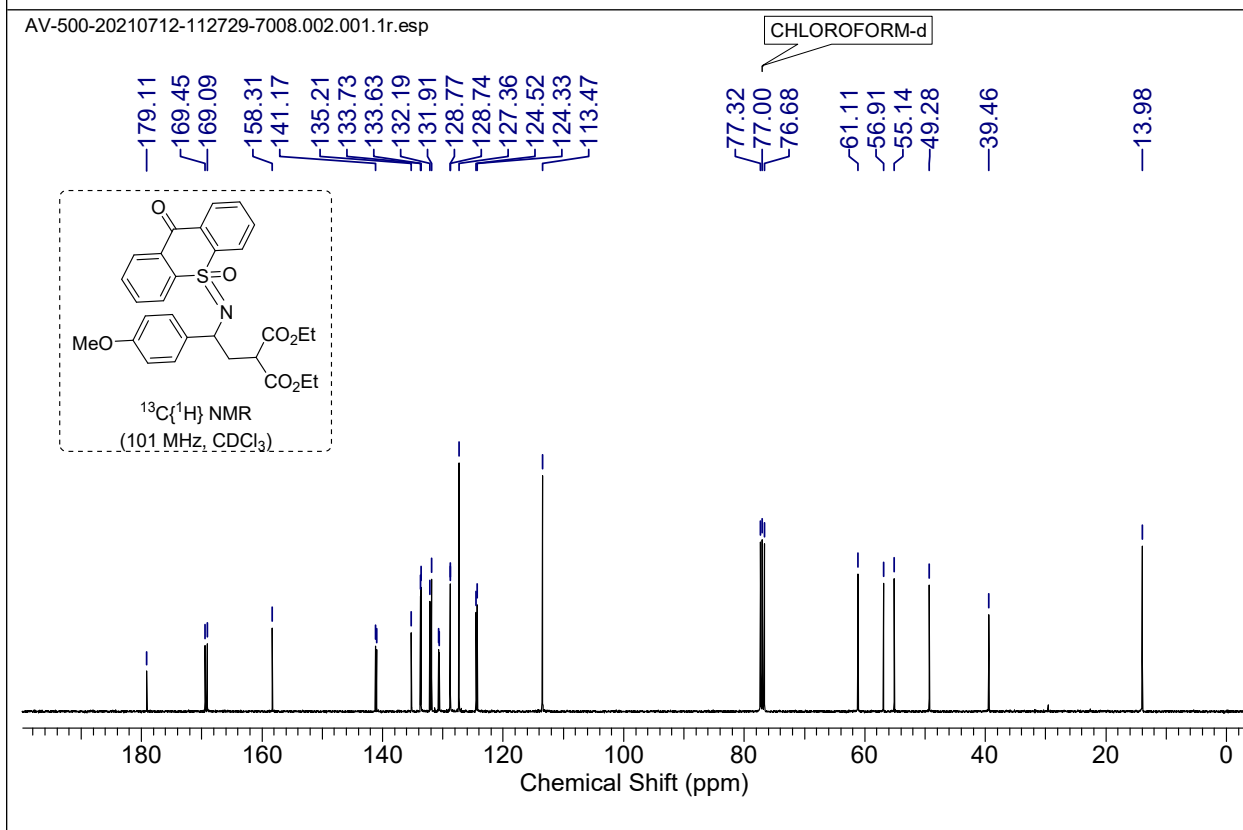

**Diethyl 2-(2-(4-methoxyphenyl)-2-((10-oxido-9-oxo-9H-10λ4-thioxanthen-10-ylidene) amino) ethyl) malonate (3q)**

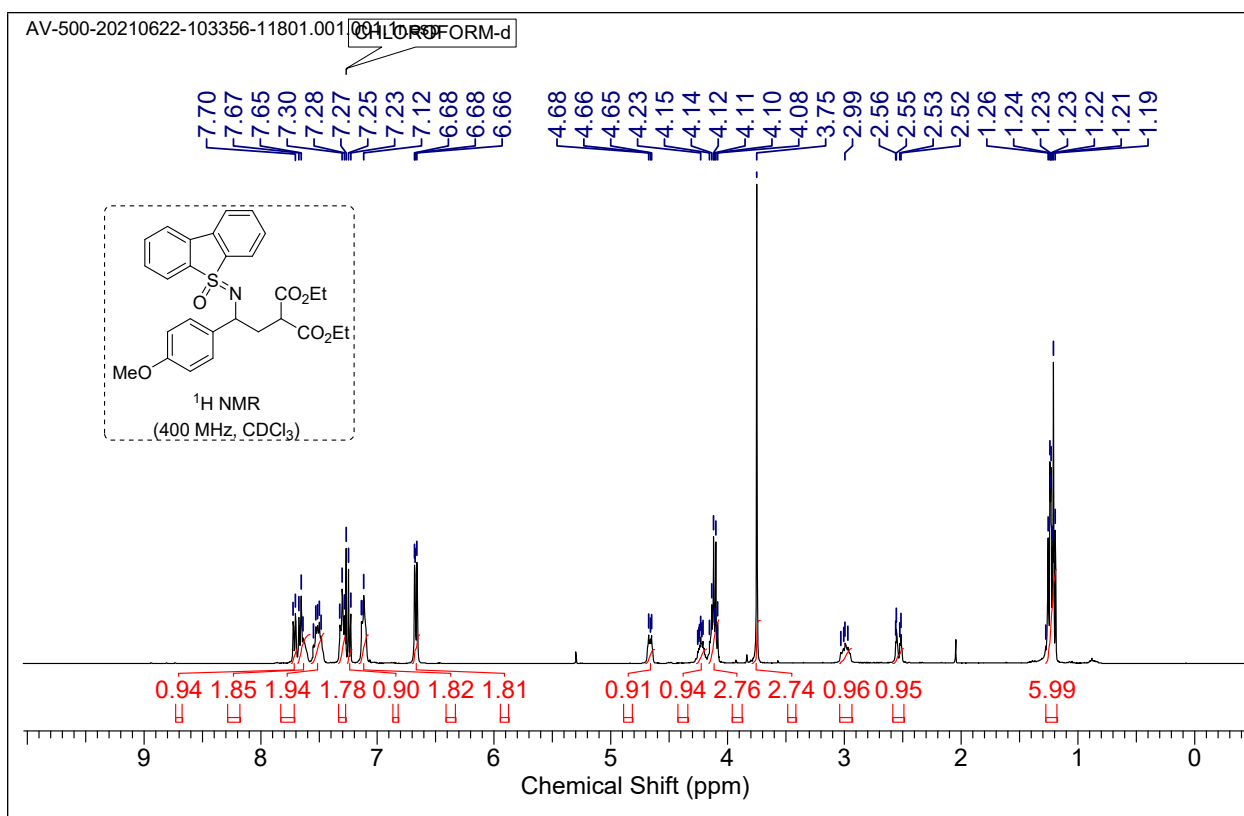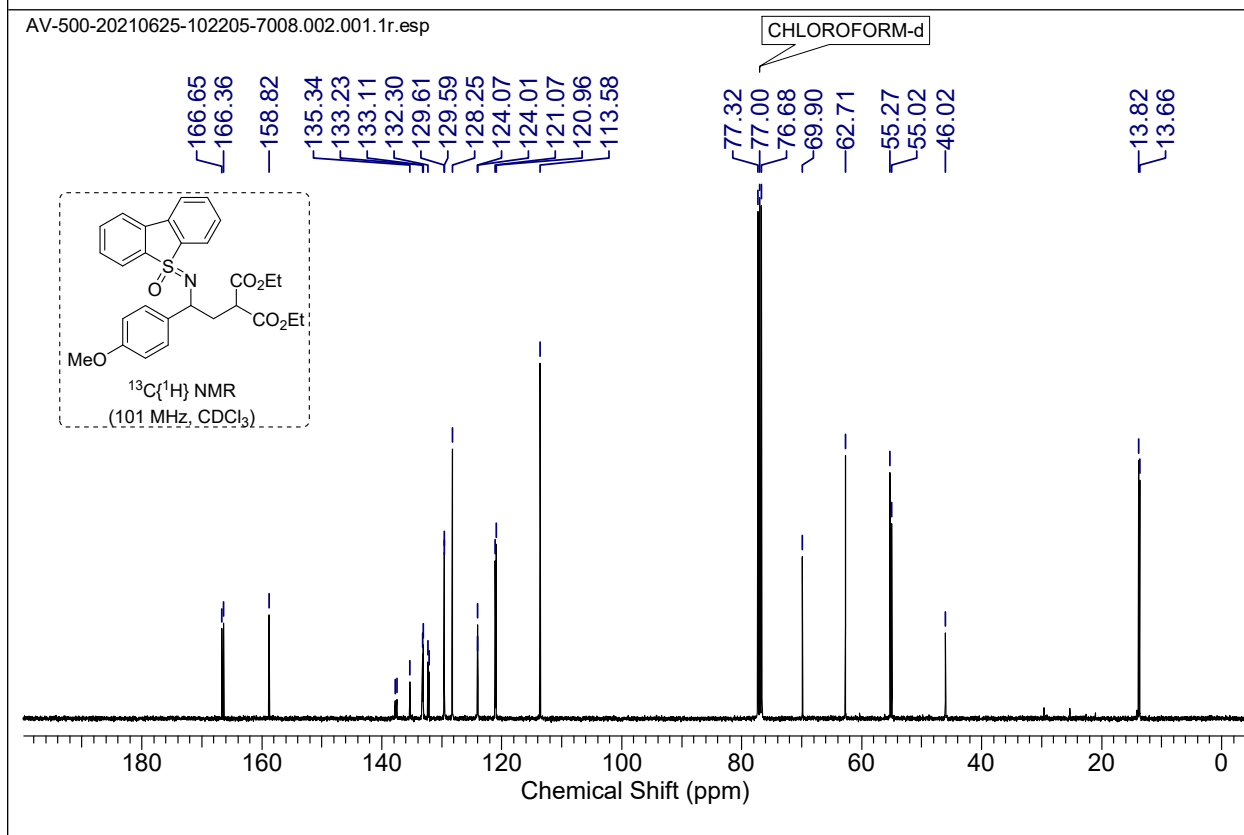

**Diethyl 2-(2-(4-methoxyphenyl)-2-((5-oxido-5 $\lambda$ 4-dibenzo [b, d] thiophen-5-ylidene) amino) ethyl malonate (3r)**

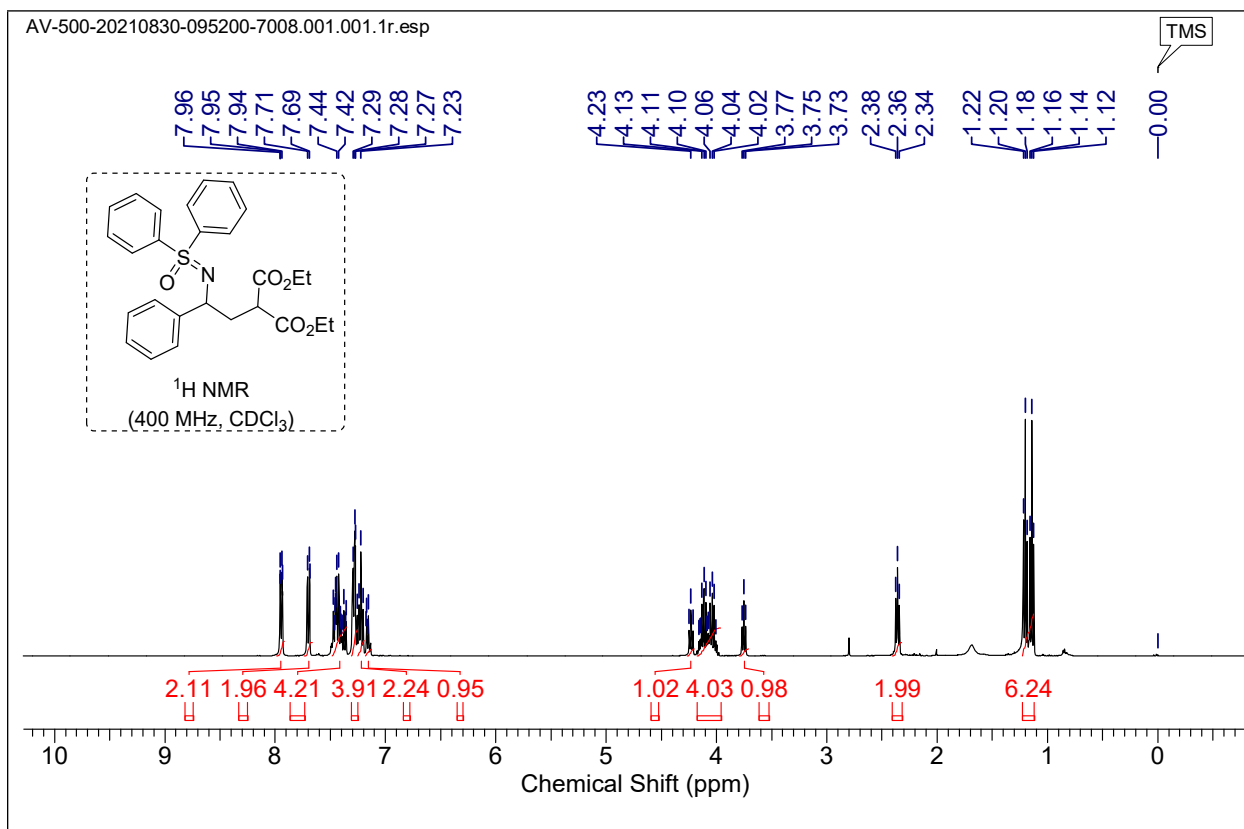



AV-400-20210901-095321-13120000.002.001.1r.esp

CHLOROFORM-d

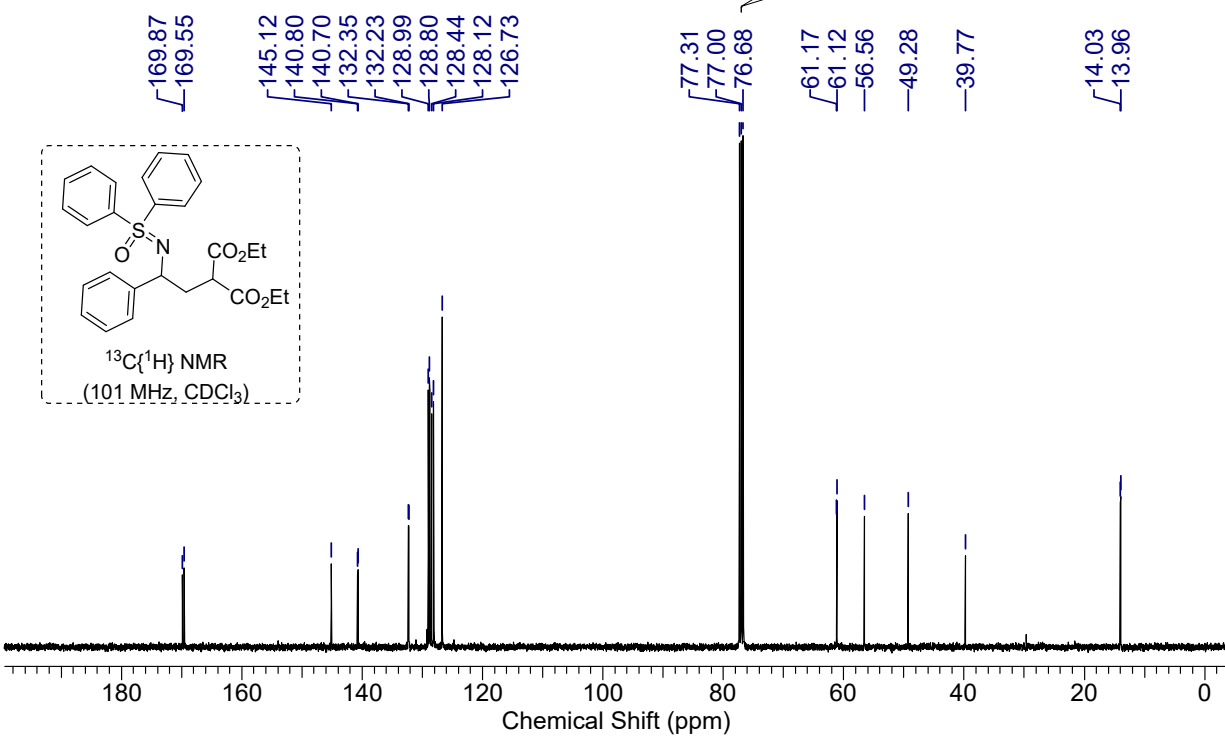

**Diethyl 2-(2-((oxodiphenyl-l6-sulfaneylidene) amino)-2-phenylethyl) malonate (5a)**

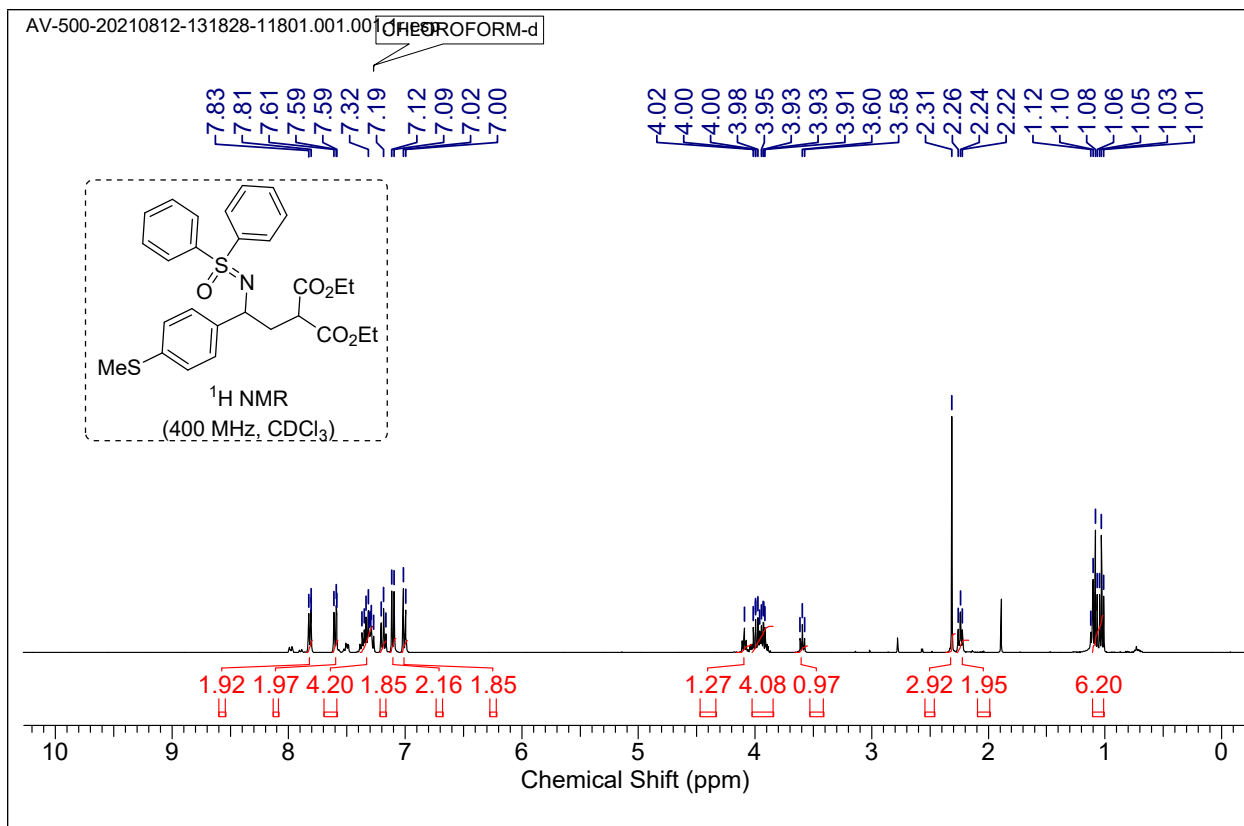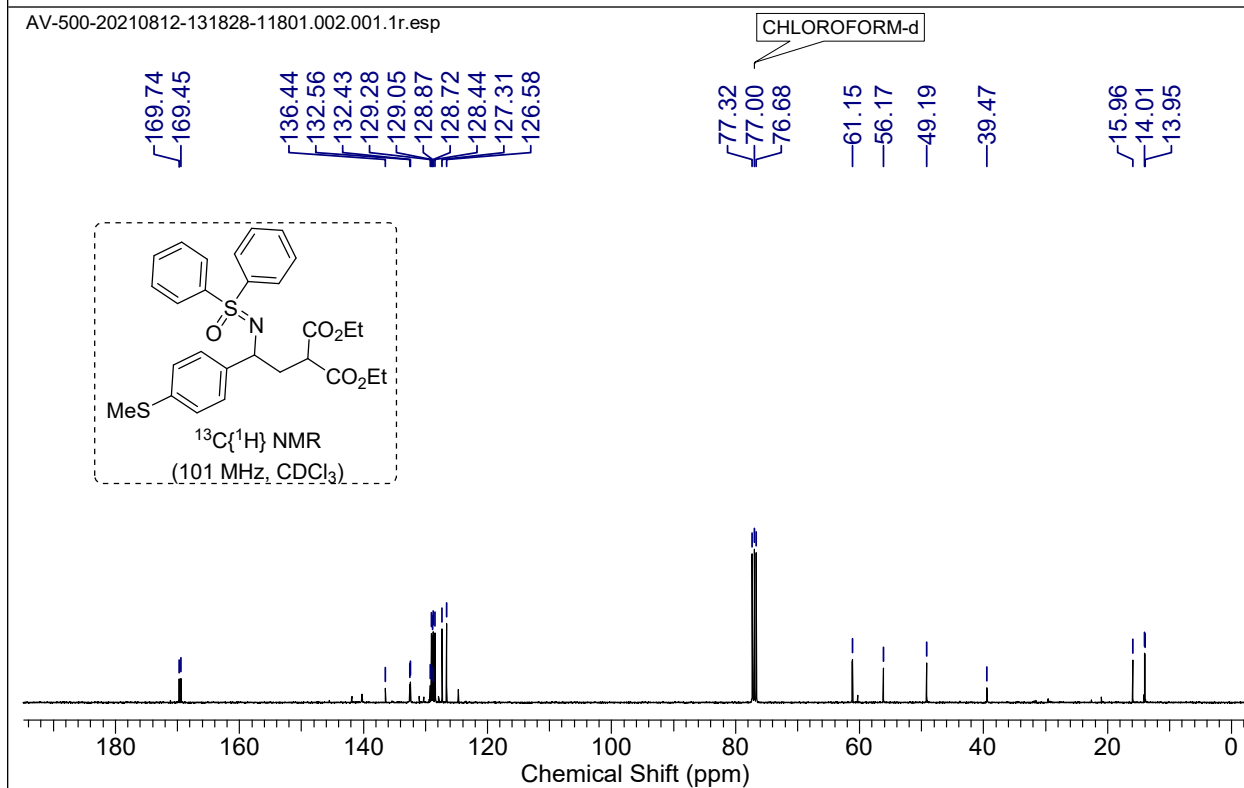

**Diethyl 2-(2-(4-(methylthio) phenyl)-2-((oxodiphenyl-16-sulfaneylidene) amino) ethyl) malonate (5b)**

AV-400-20210910-162310-11801.001.001.1r.esp

TMS

8.14  
8.12  
7.96  
7.94  
7.77  
7.75  
7.53  
7.51  
7.50  
7.38  
7.36

4.36  
4.20  
4.19  
4.17  
4.15  
4.12  
4.10  
4.08  
3.79  
3.39  
2.38  
2.37  
2.36  
2.35  
1.28  
1.26  
1.24  
1.22  
1.20  
1.18

0.00

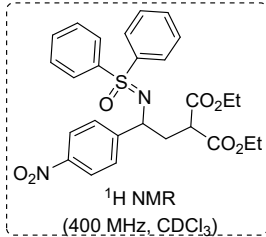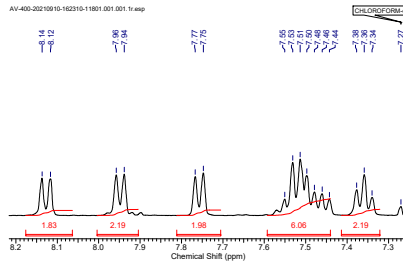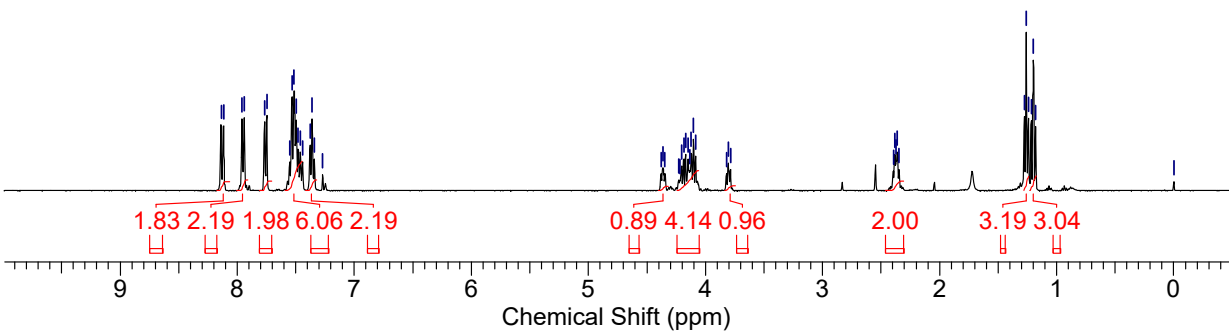

AV-400-20210910-162310-11801.002.001.1r.esp

CHLOROFORM-d

169.53  
169.26  
152.88  
146.82  
140.42  
140.07  
132.69  
132.59  
129.18  
128.97  
128.42  
128.38  
127.61  
123.50

77.32  
77.00  
76.68  
61.33  
55.96  
48.97  
39.35  
13.94

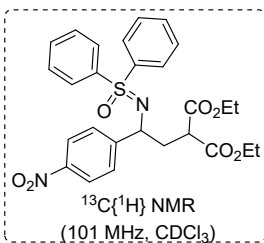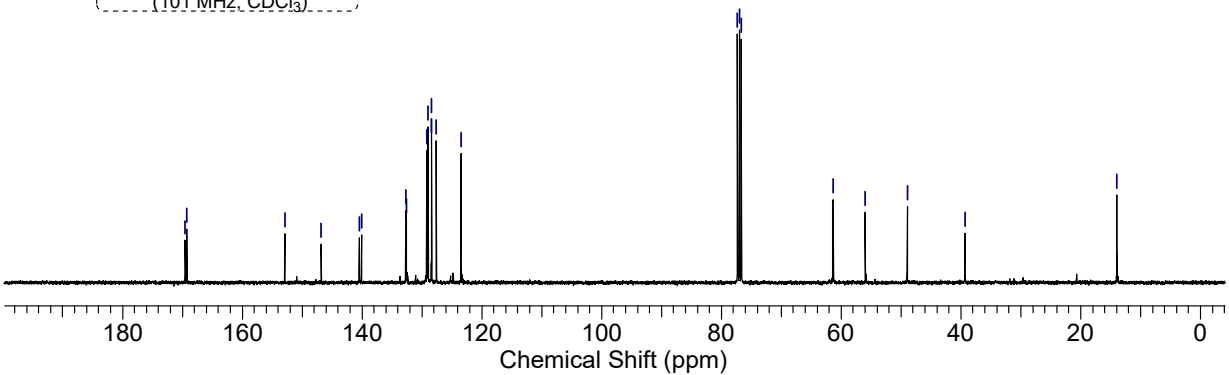

**Diethyl 2-(2-(4-nitrophenyl)-2-((oxodiphenyl-16-sulfanylidene) amino) ethyl) malonate (5c)**

AV-400-20210831-101110-13120000.001.001.1r.esp

TMS

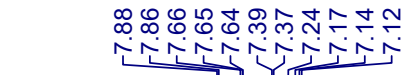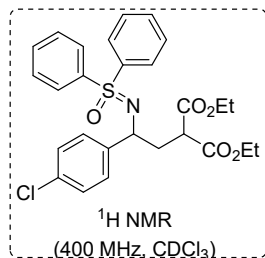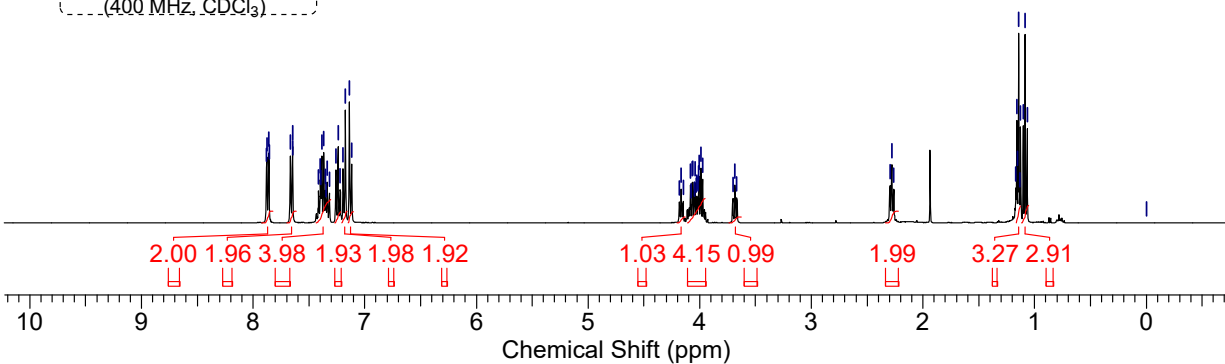

AV-500-20210830-170515-7008.002.001.1r.esp

CHLOROFORM-d

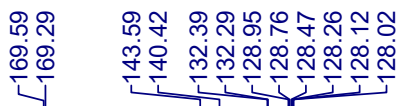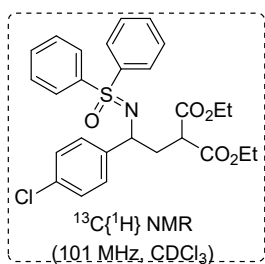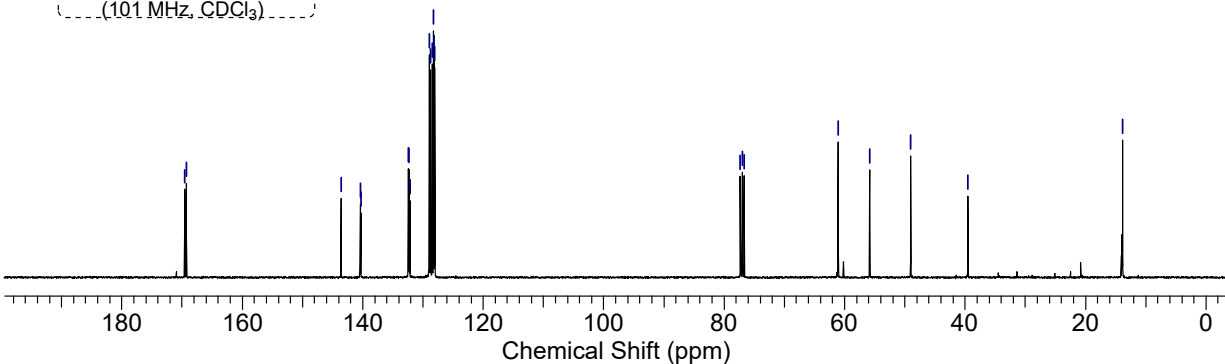

**Diethyl 2-(2-(4-chlorophenyl)-2-((oxodiphenyl-16-sulfaneylidene) amino) ethyl) malonate (5d)**

AV-400-20210907-163521-7008.001.001.1r.esp

TMS

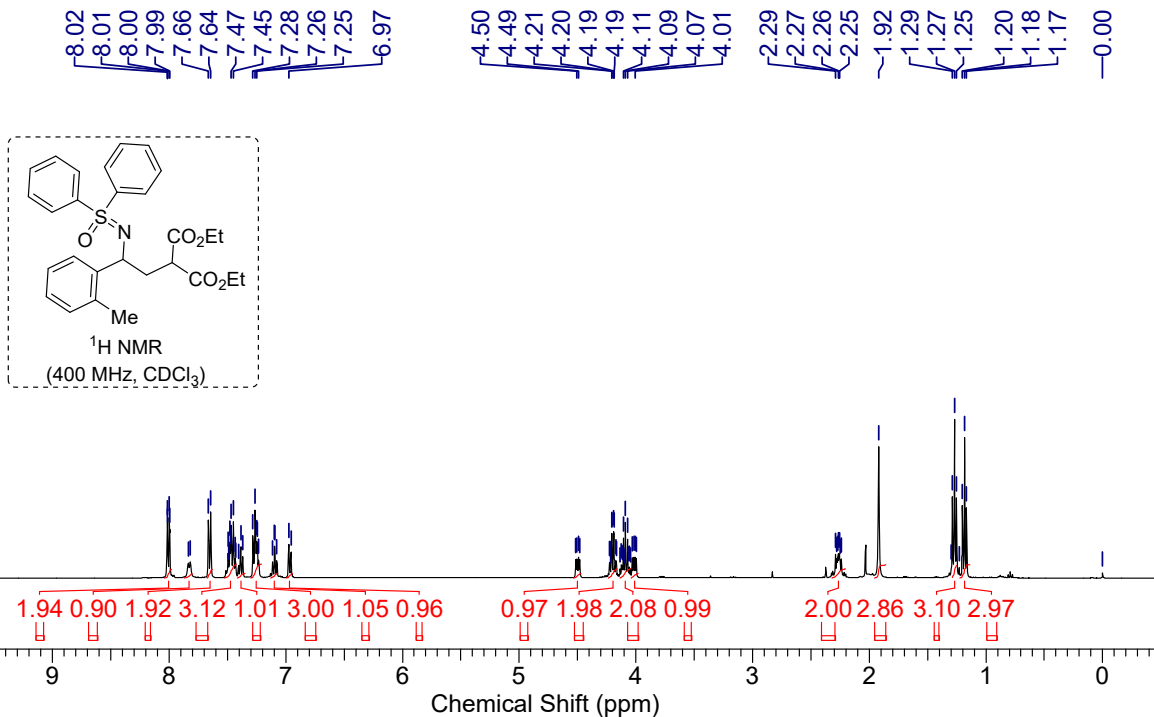

AV-400-20210907-163521-7008.002.001.1r.esp

CHLOROFORM-d

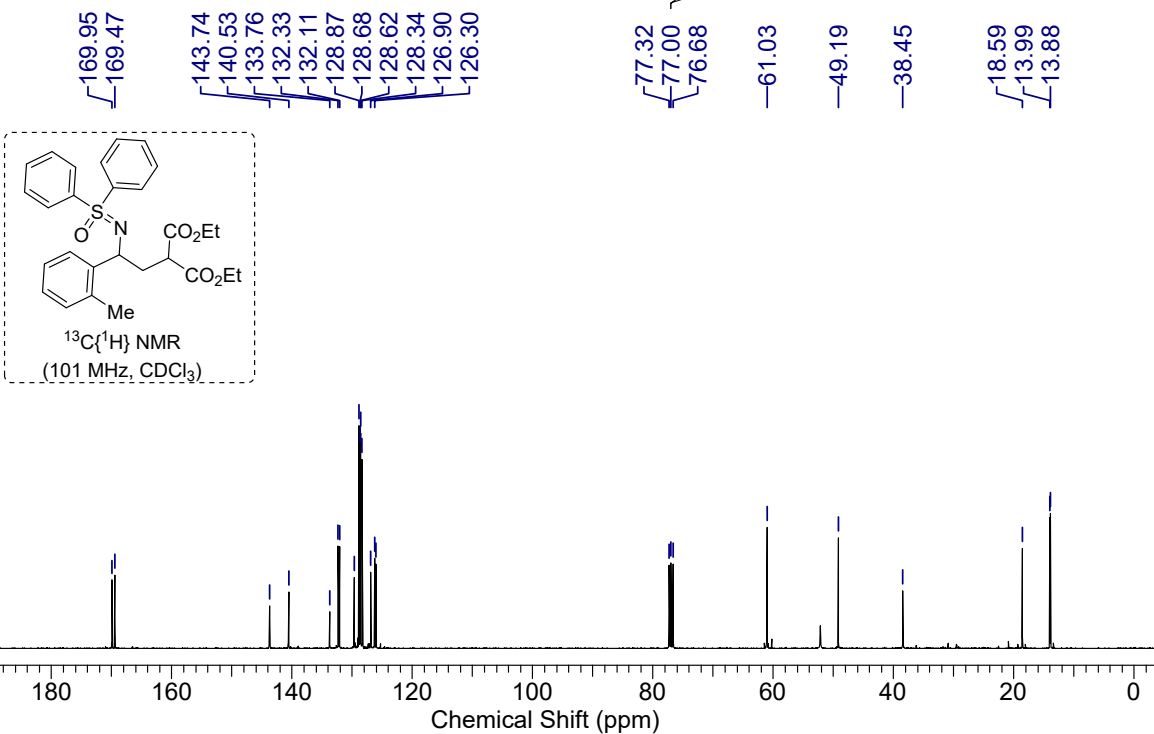

**Diethyl 2-(2-((oxodiphenyl-16-sulfanylidene) amino)-2-(*o*-tolyl) ethyl) malonate (5e)**

AV-500-20210830-094938-11801.001.D CDCl<sub>3</sub> DMSO-d<sub>6</sub>

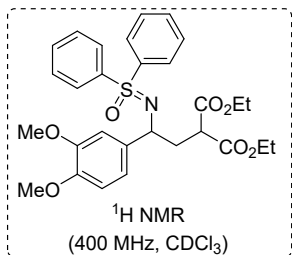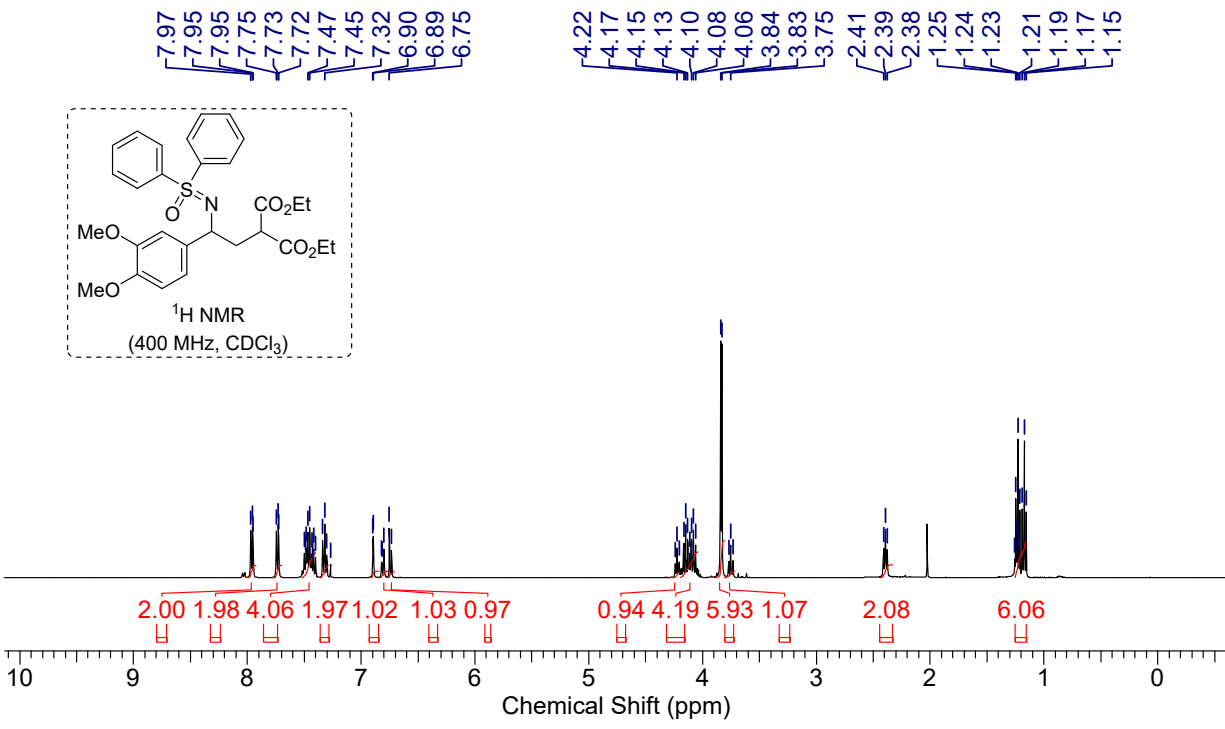

AV-500-20210901-095343-13120000.002.001.1r.esp

CHLOROFORM-d

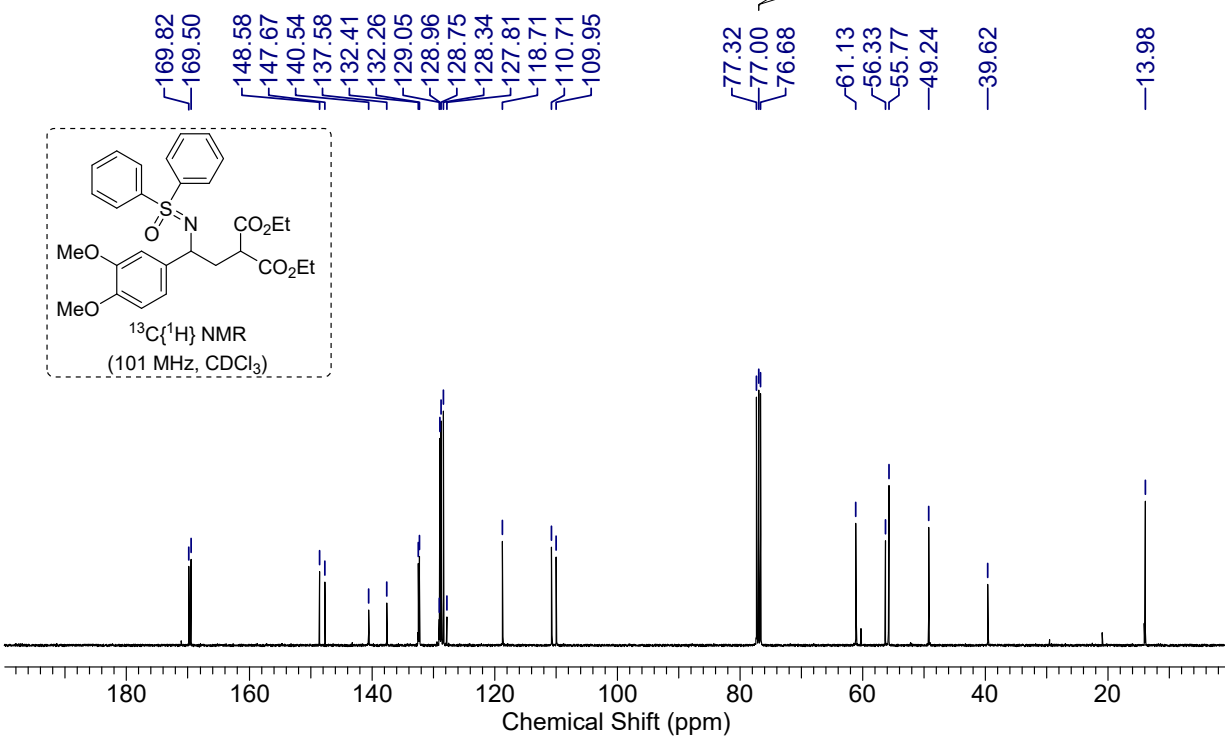

**Diethyl 2-(2-(3,4-dimethoxyphenyl)-2-((oxodiphenyl-16-sulfaneylidene) amino) ethyl) malonate (5f)**

AV-400-20210825-100942-11801.001.001.10r1  
CHLOROFORM-d

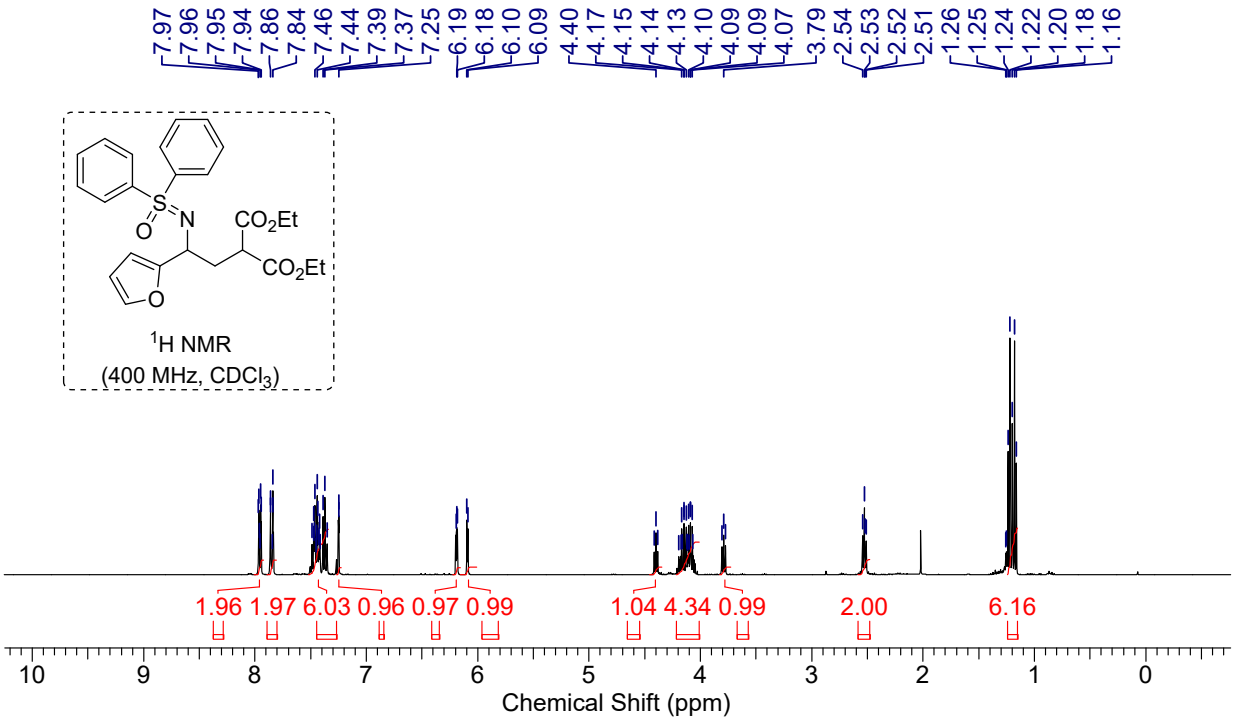

AV-400-20210825-100942-11801.002.001.1r.esp

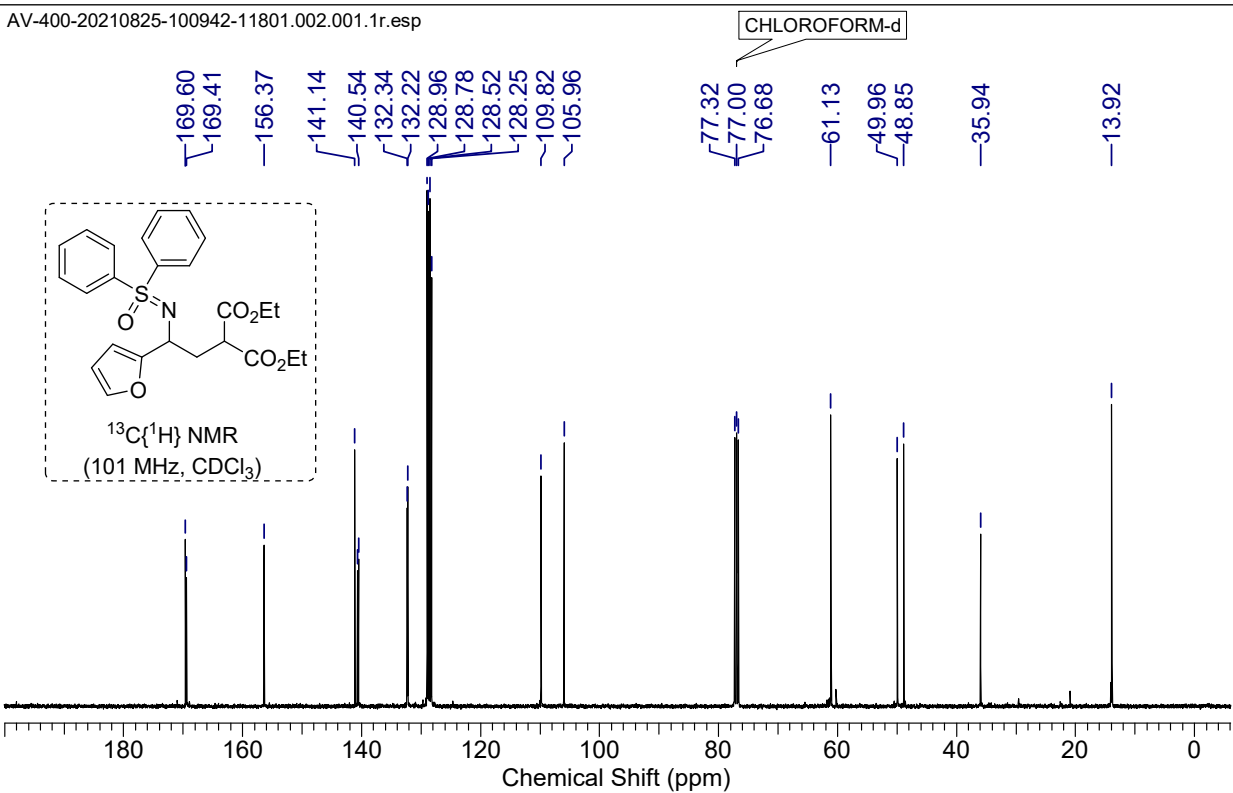

**Diethyl 2-(2-(furan-2-yl)-2-((oxodiphenyl-16-sulfaneylidene) amino) ethyl) malonate (5g)**



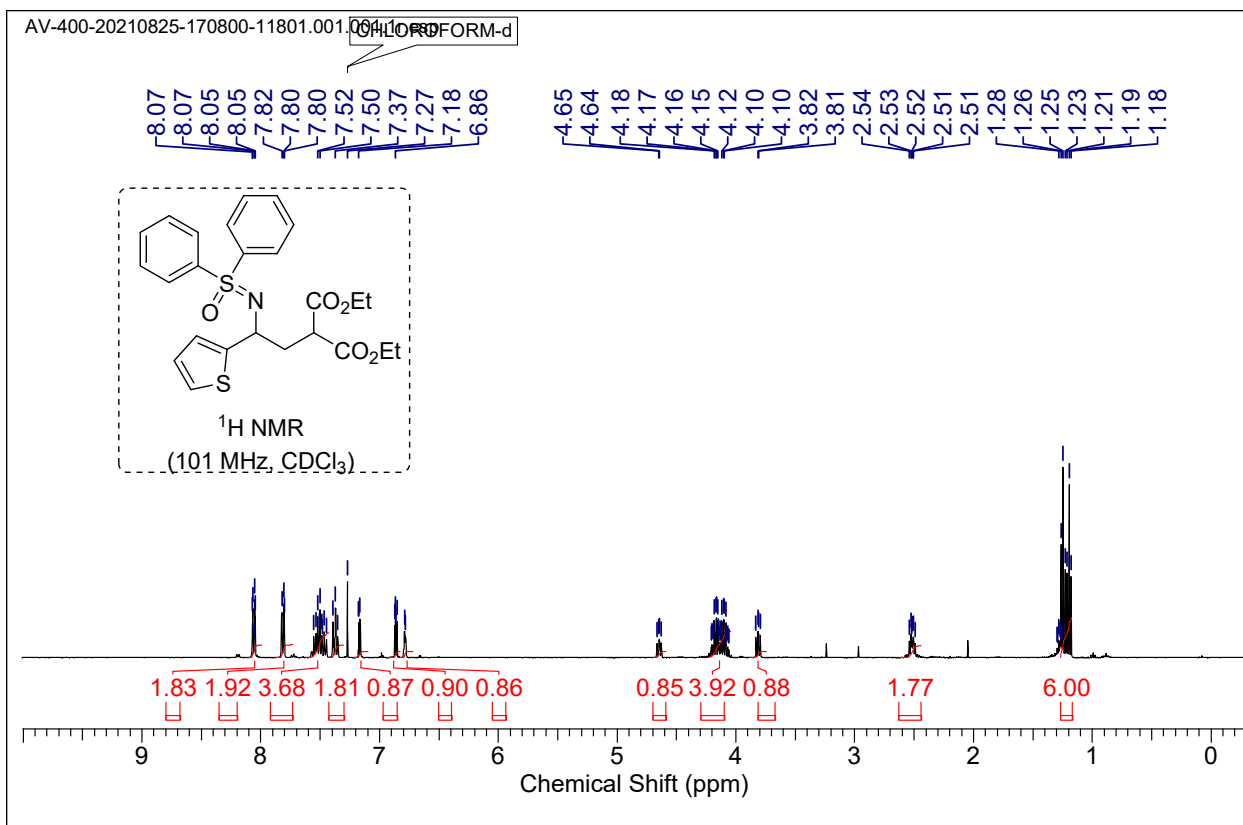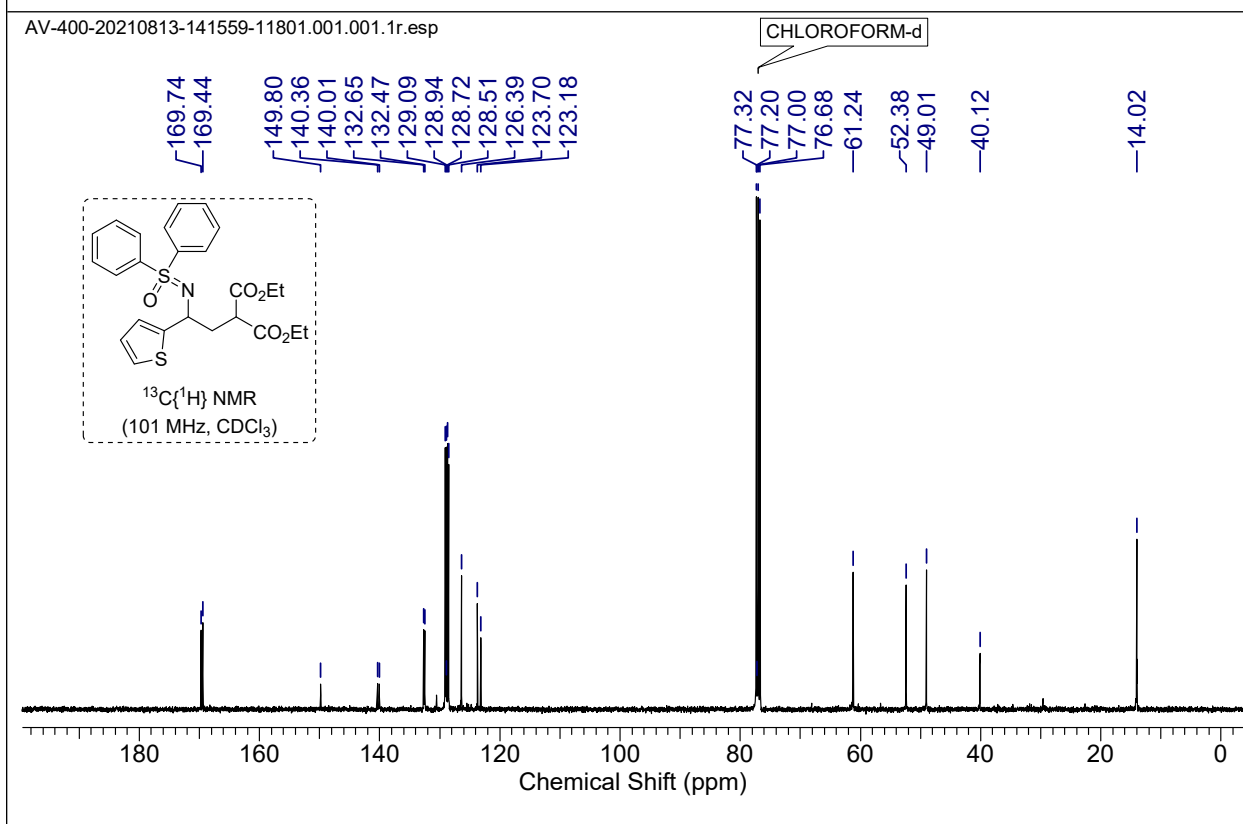

Diethyl 2-(2-((oxodiphenyl-l6-sulfaneylidene) amino)-2-(thiophen-2-yl) ethyl) malonate  
(5h)

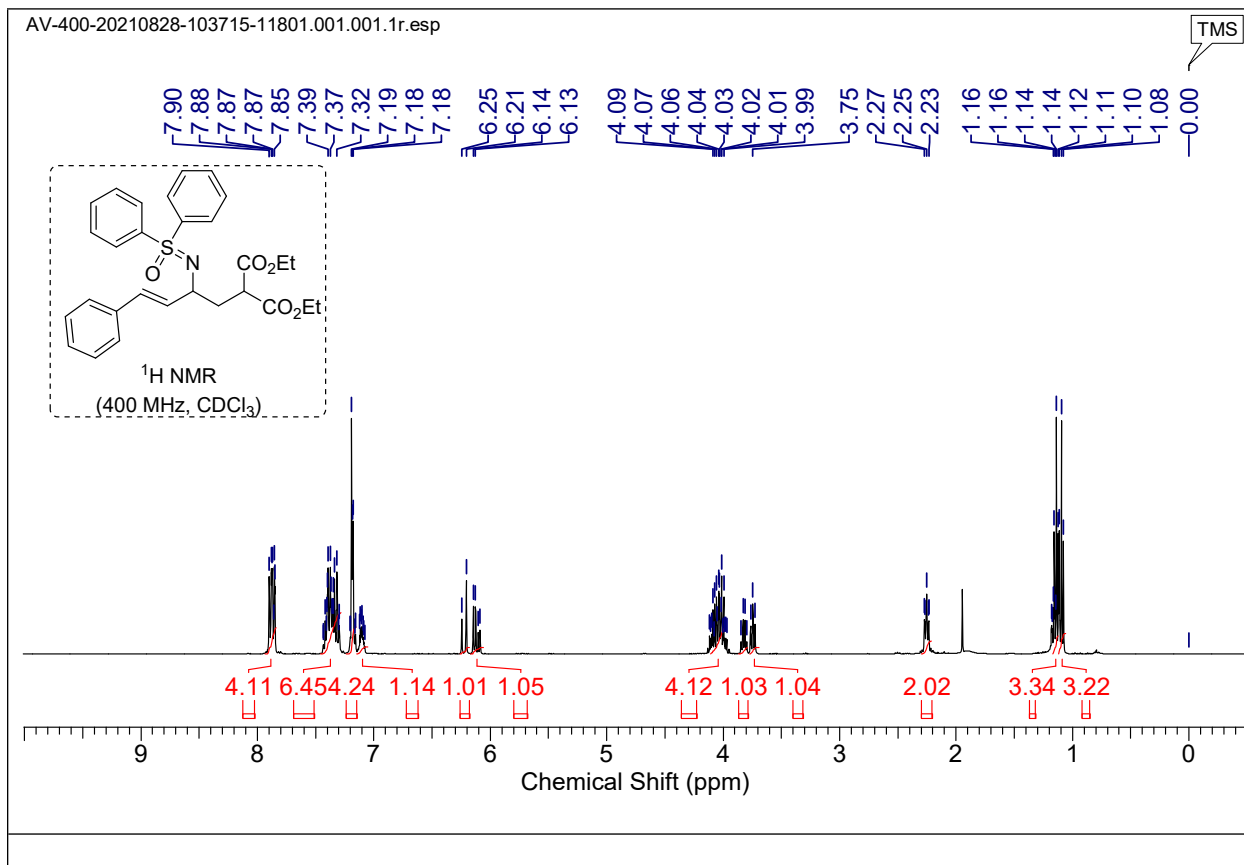

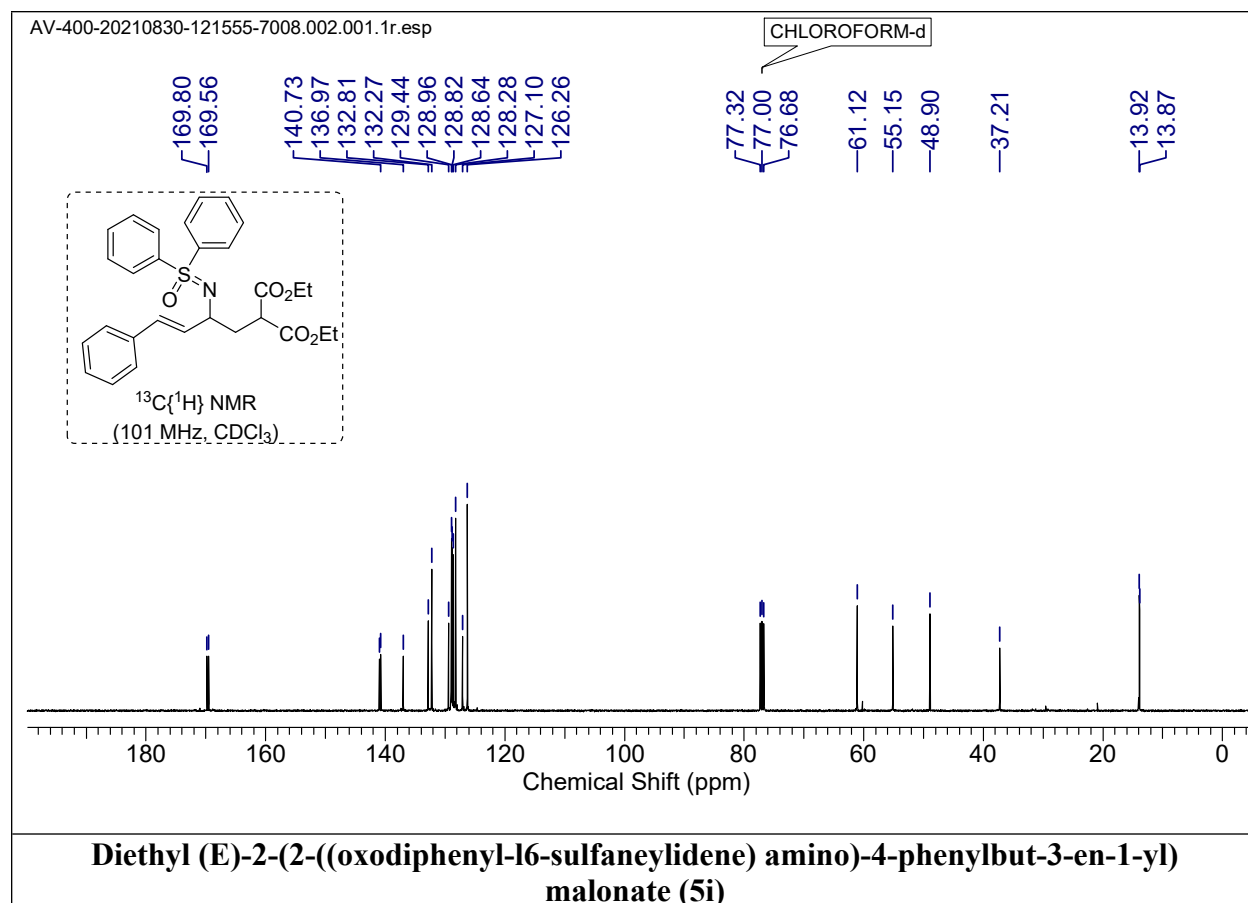

4. <sup>1</sup>H, and <sup>13</sup>C NMR spectrum of  $\gamma$ -sulfoximino,  $\alpha$ - bromo malonic diester (6)

AV-500-20210825-101005-11801.001.001.1r.esp

TMS

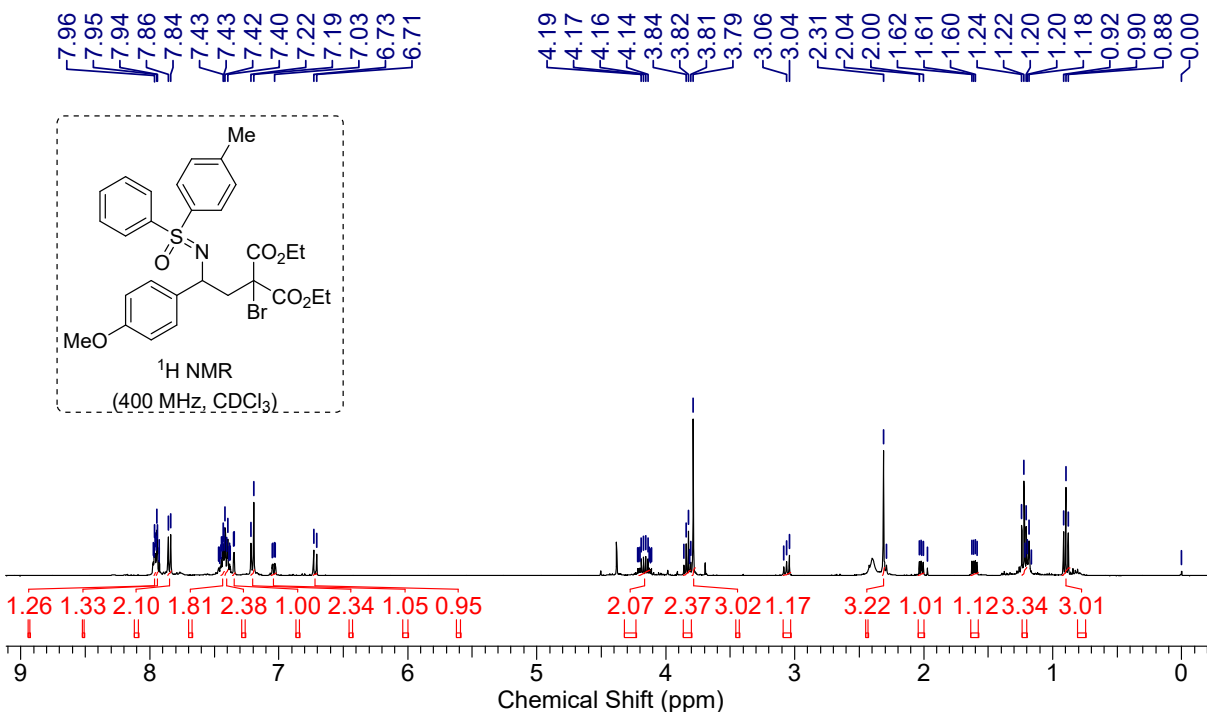

AV-500-20210825-101005-11801.002.001.1r.esp

CHLOROFORM-d

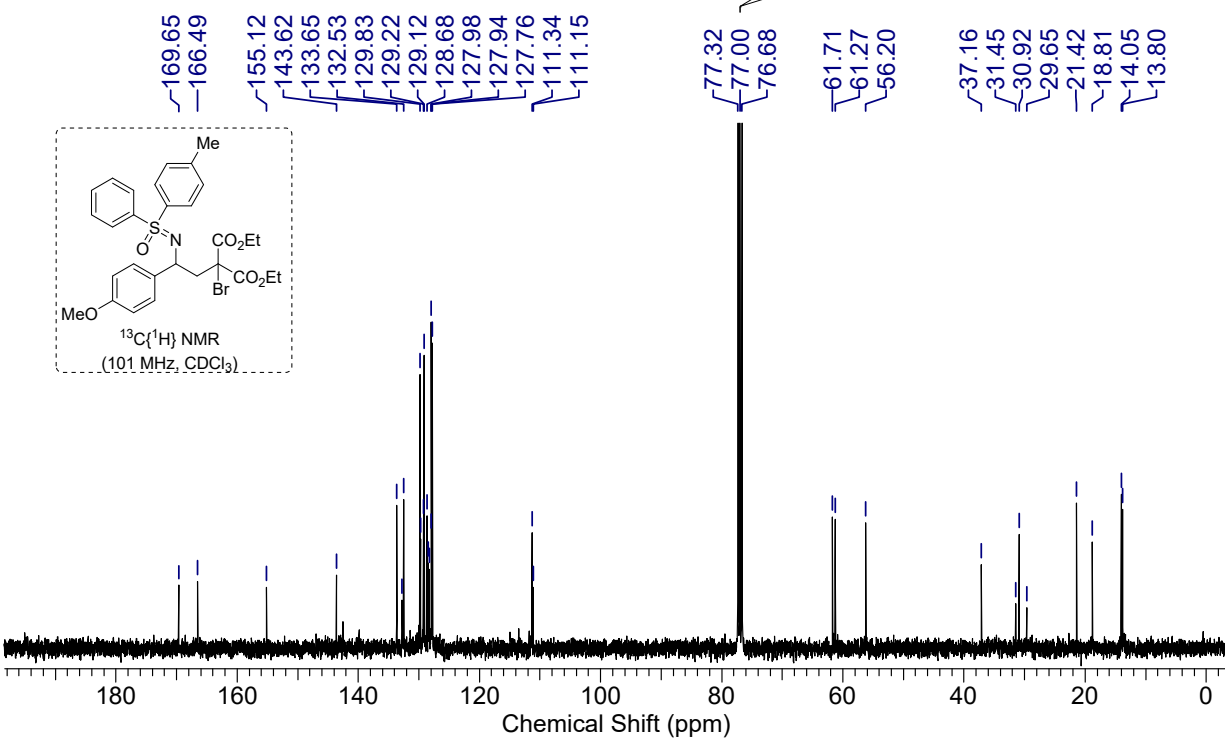

Diethyl 2-bromo-2-(2-(4-methoxyphenyl)-2-((oxo(phenyl)(*p*-tolyl)-16-sulfaneylidene) amino) ethyl) malonate (6)

5. <sup>1</sup>H, and <sup>13</sup>C NMR spectrum of synthetic utility of product 3a (7)

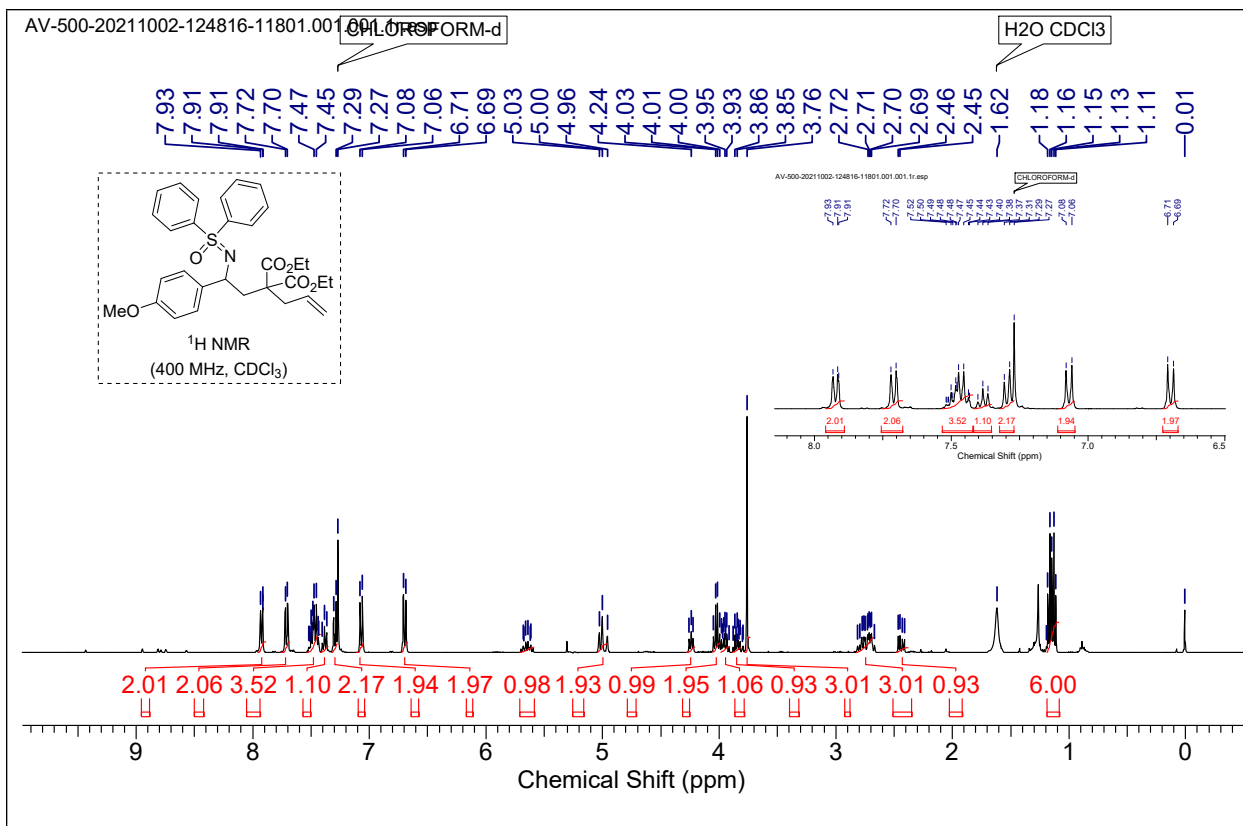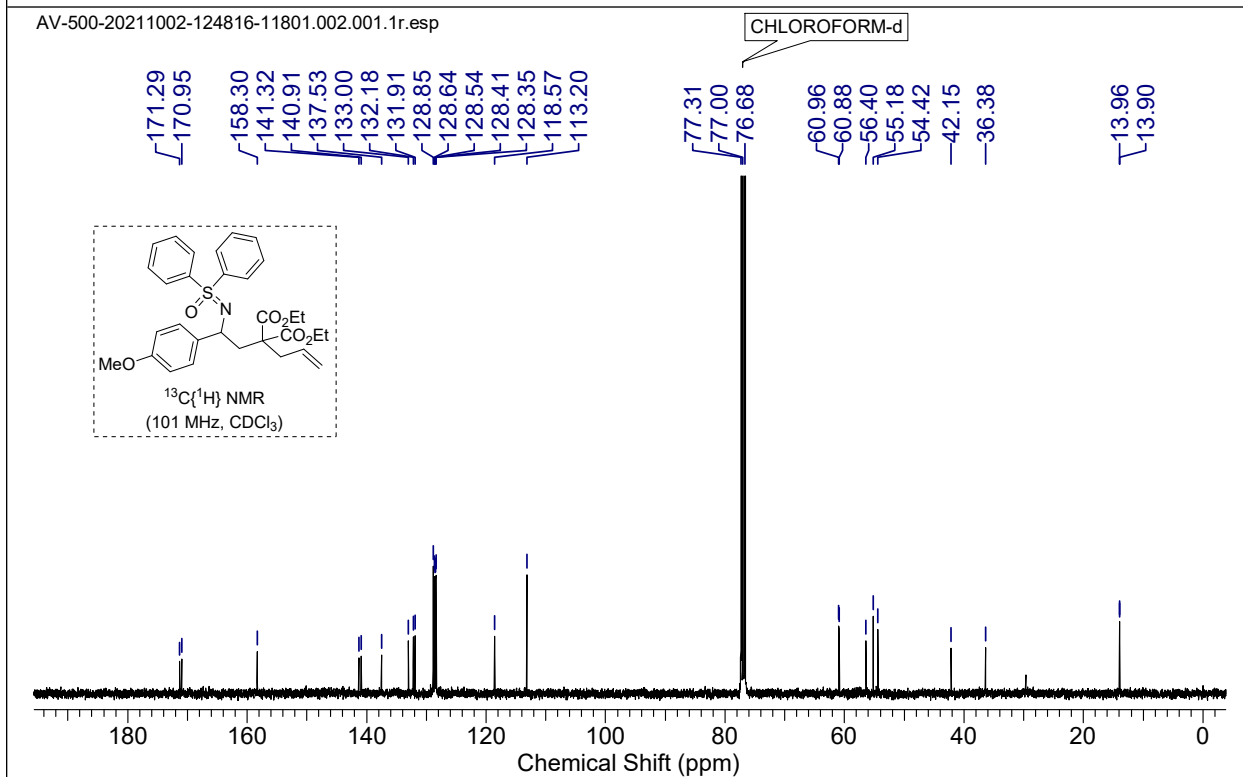

**Diethyl 2-allyl-2-(2-(4-methoxyphenyl)-2-((oxodiphenyl-l6-sulfaneylidene) amino) ethyl) malonate (7)**
